# Supplementary material for: De novo transcriptomic analysis and development of EST-SSRs for Sorbus pohuashanensis (Hance) Hedl
Source: PubMed Central journal article supplement (PMC5470691; doi:10.1371/journal.pone.0179219), 2017-06-14

**Sample 1:** sorsb3-01.A01.fsa Run date and time: 03/19/2017 - 18:17:56 -> 03/19/2017 - 19:01:55

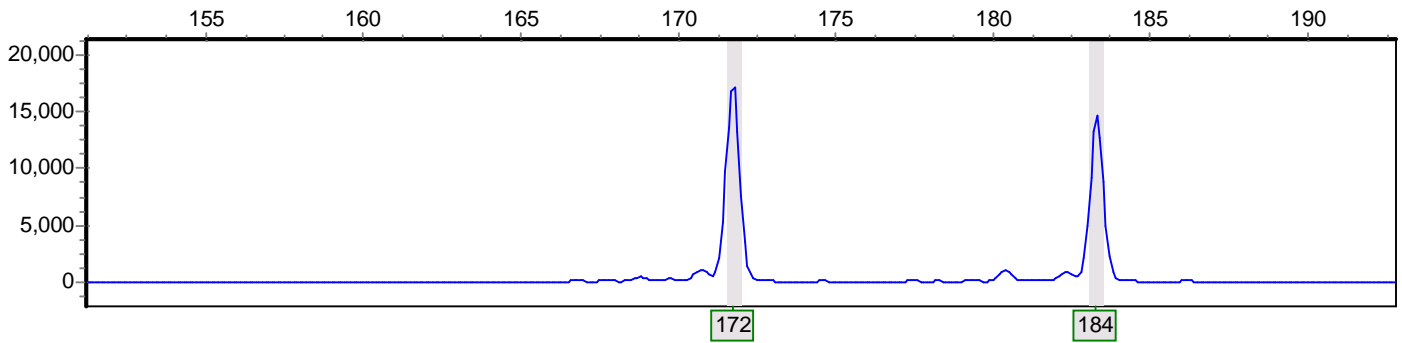

**Sample 2:** sorsb3-04.B01.fsa Run date and time: 03/19/2017 - 18:17:56 -> 03/19/2017 - 19:01:55

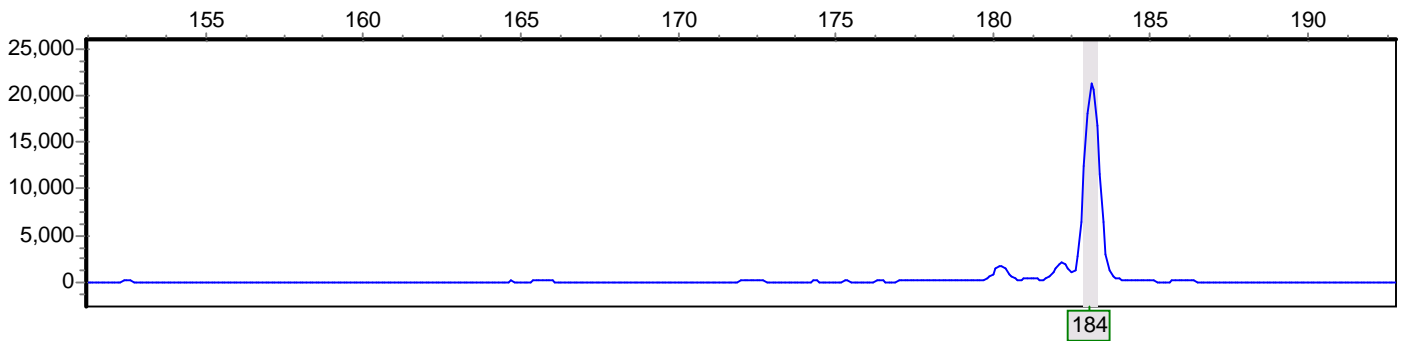

**Sample 3:** sorsb3-05.A01.fsa Run date and time: 03/21/2017 - 13:32:38 -> 03/21/2017 - 14:23:07

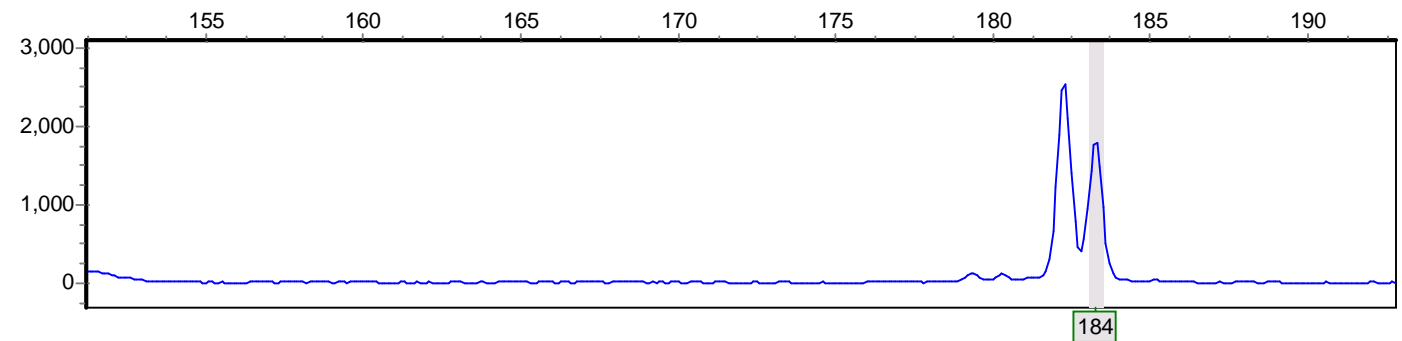

**Sample 4:** sorsb3-06.B01.fsa Run date and time: 03/21/2017 - 13:32:38 -> 03/21/2017 - 14:23:07

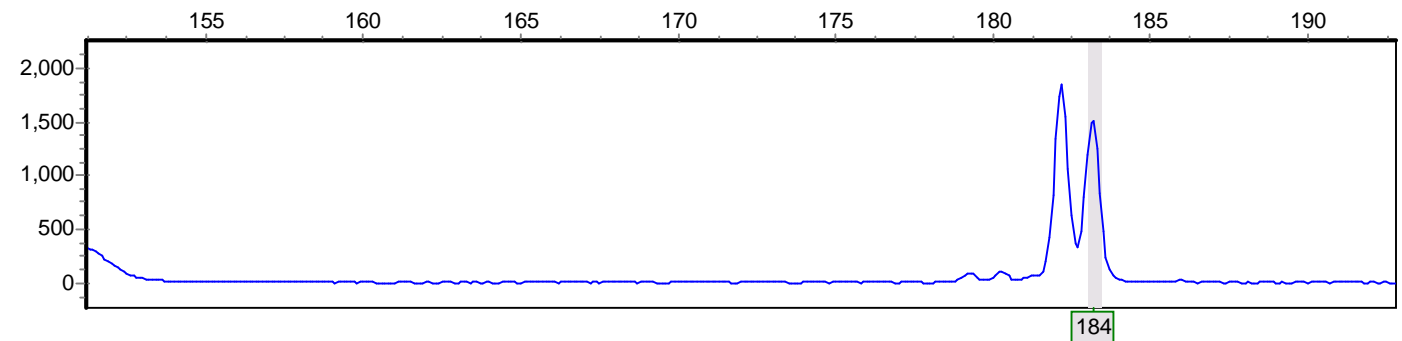

**Sample 5:** sorsb3-07.C01.fsa Run date and time: 03/21/2017 - 13:32:38 -> 03/21/2017 - 14:23:07

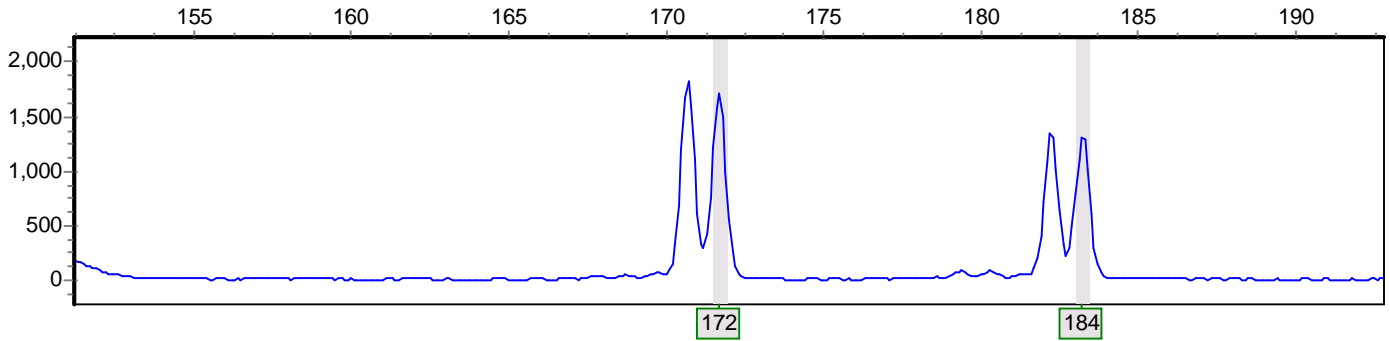

**Sample 6** sorsb3-08-1.E01.fsa Run date and time: 03/20/2017 - 21:37:15 -> 03/20/2017 - 22:21:17

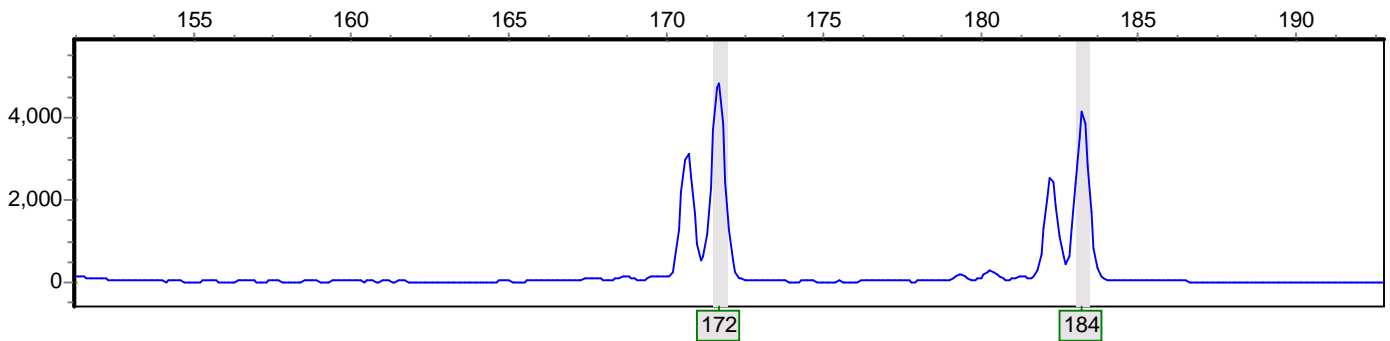

**Sample 7** sorsb3-08.D01.fsa Run date and time: 03/20/2017 - 21:37:15 -> 03/20/2017 - 22:21:17

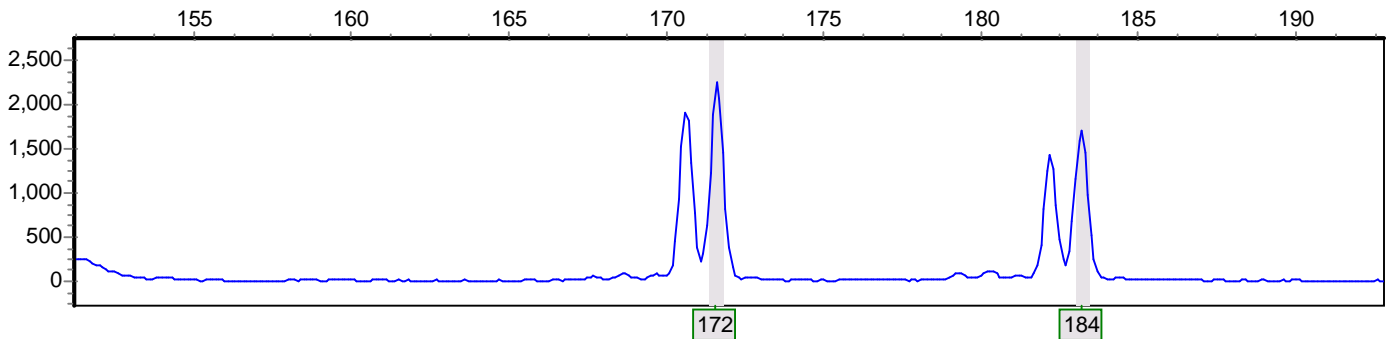

**Sample 8** sorsb3-09.F01.fsa Run date and time: 03/20/2017 - 21:37:15 -> 03/20/2017 - 22:21:17

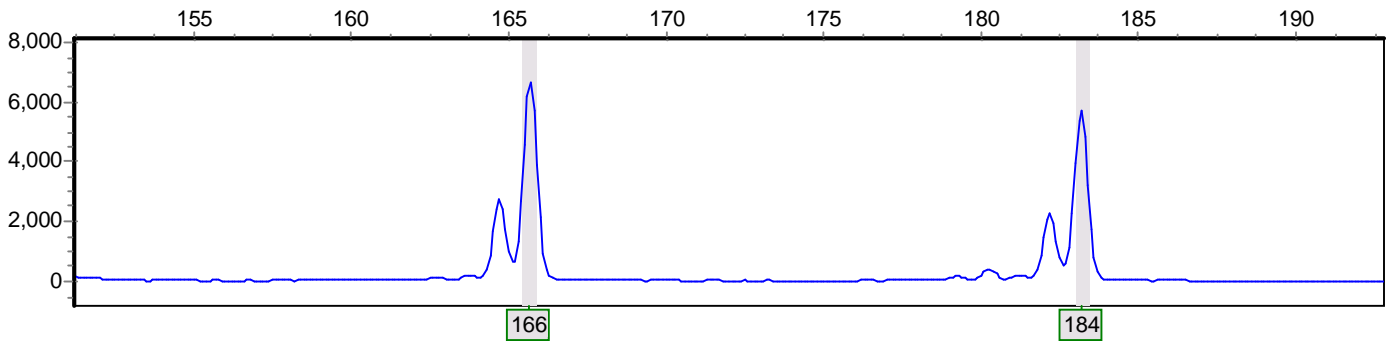

**Sample 1:** sorsb9-01.C01.fsa Run date and time: 03/19/2017 - 18:17:56 -> 03/19/2017 - 19:01:55

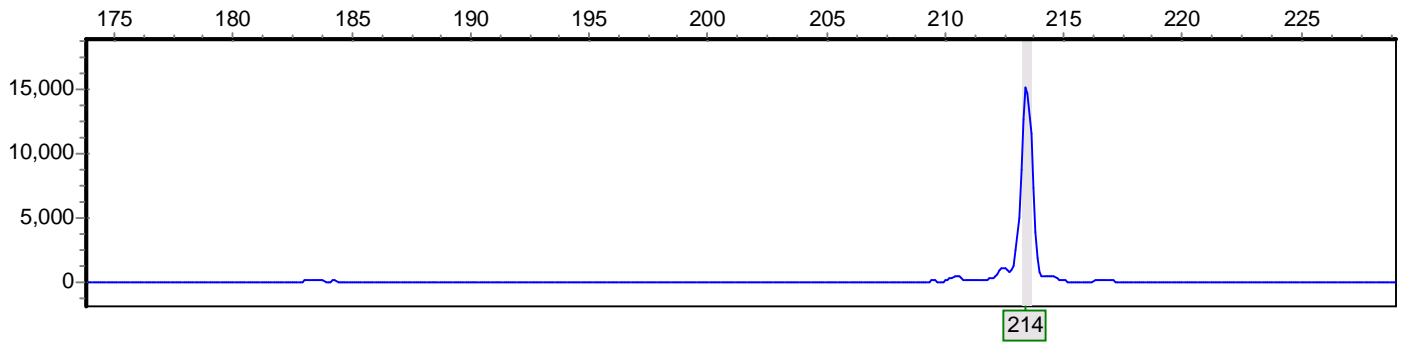

**Sample 2:** sorsb9-04.D01.fsa Run date and time: 03/21/2017 - 13:32:38 -> 03/21/2017 - 14:23:07

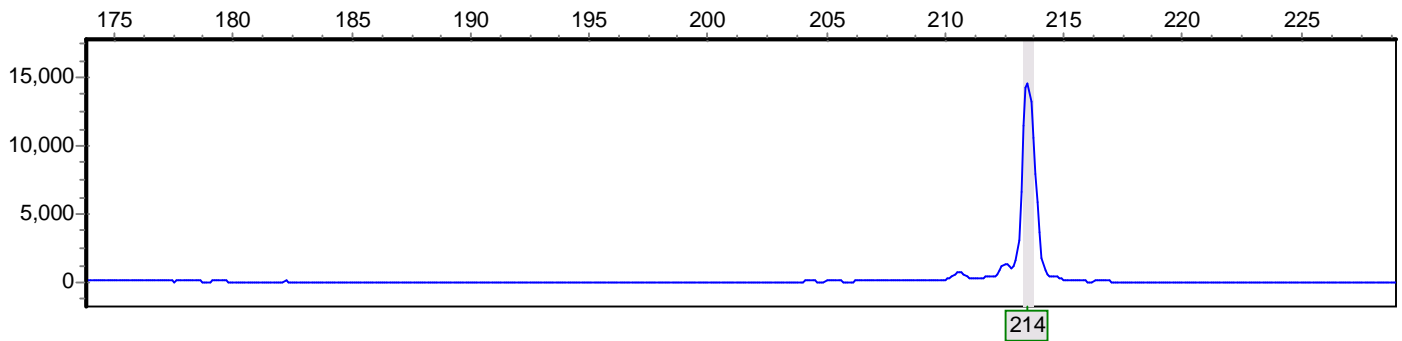

**Sample 3:** sorsb9-05.A02.fsa Run date and time: 03/20/2017 - 21:37:15 -> 03/20/2017 - 22:21:17

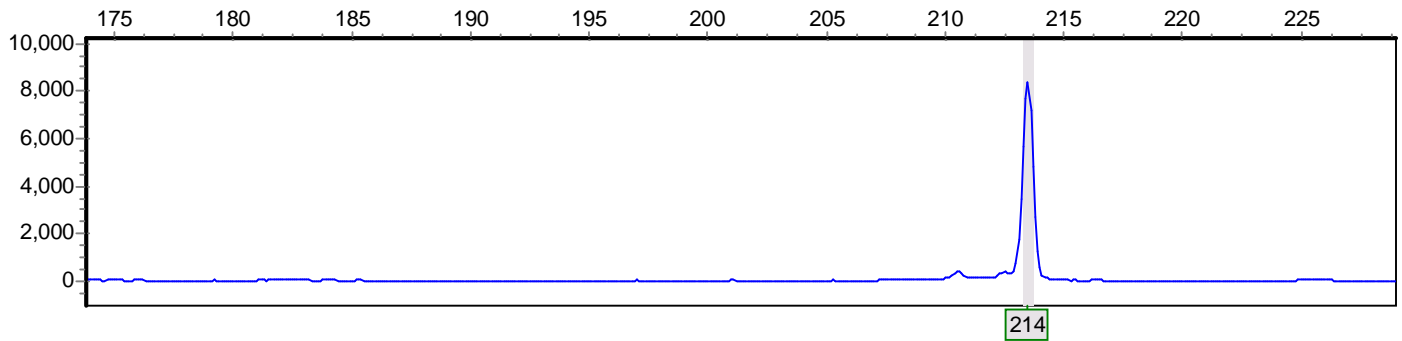

**Sample 4:** sorsb9-06.B02.fsa Run date and time: 03/20/2017 - 21:37:15 -> 03/20/2017 - 22:21:17

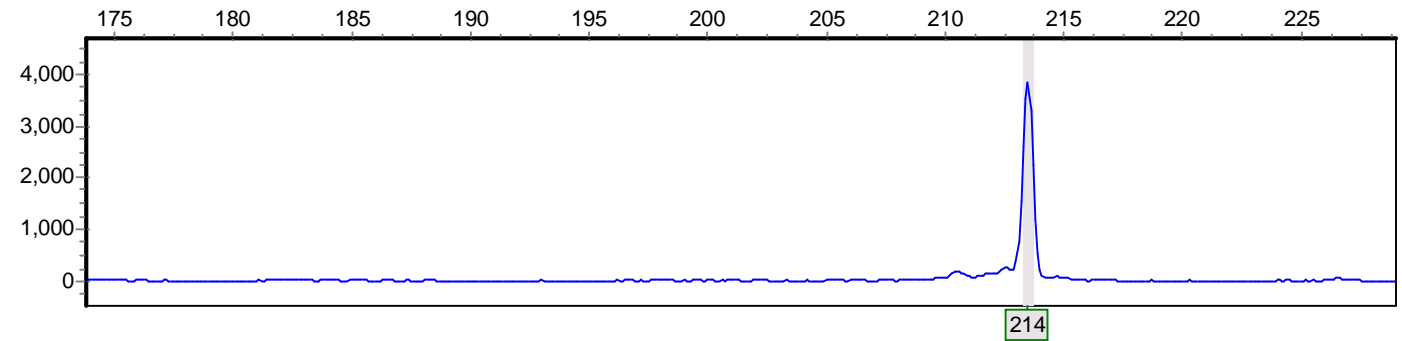

Sample 5: sorsb9-07.C02.fsa Run date and time: 03/20/2017 - 21:37:15 -> 03/20/2017 - 22:21:17

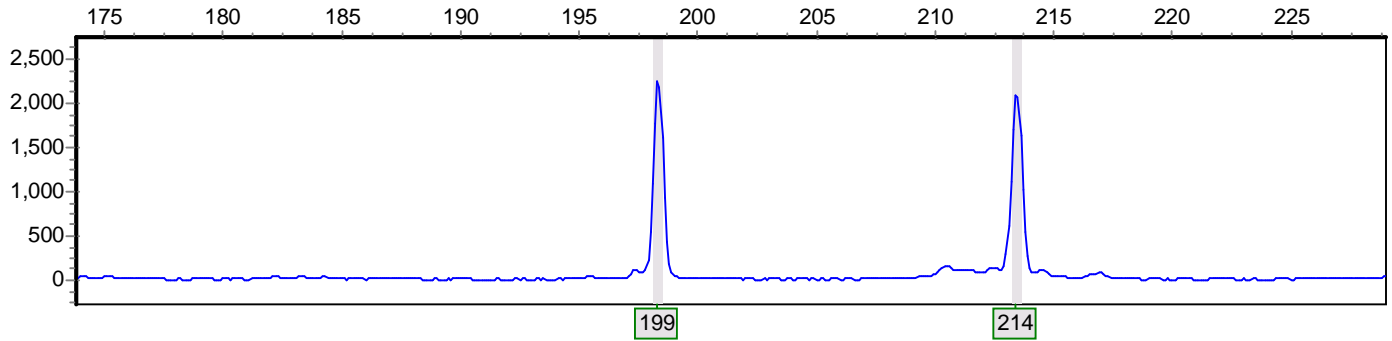

Sample 6 sorsb9-08-1.E02.fsa Run date and time: 03/20/2017 - 21:37:15 -> 03/20/2017 - 22:21:17

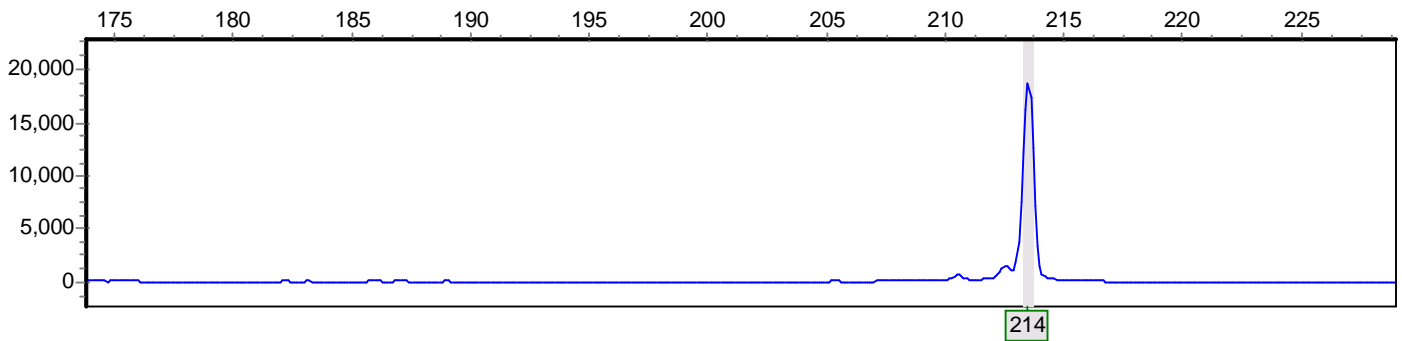

Sample 7 sorsb9-08.D02.fsa Run date and time: 03/20/2017 - 21:37:15 -> 03/20/2017 - 22:21:17

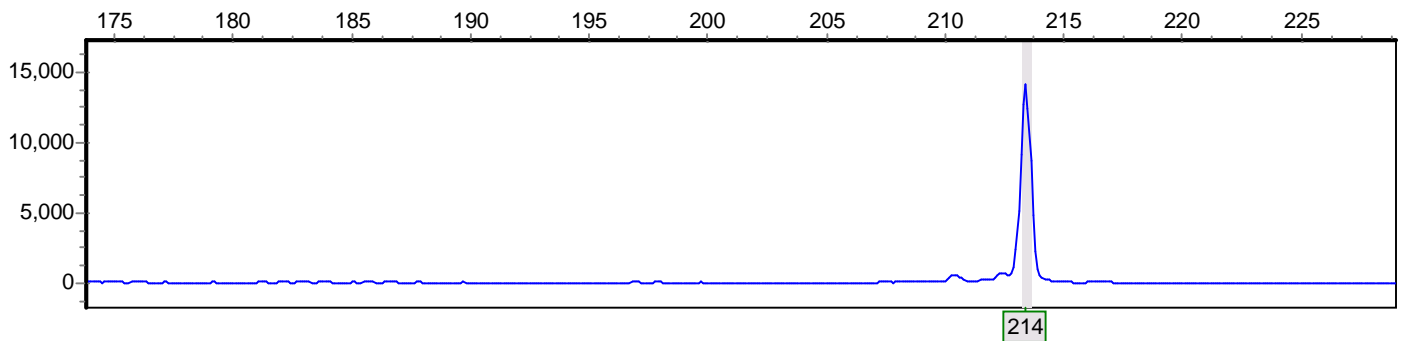

Sample 8 sorsb9-09.F02.fsa Run date and time: 03/20/2017 - 21:37:15 -> 03/20/2017 - 22:21:17

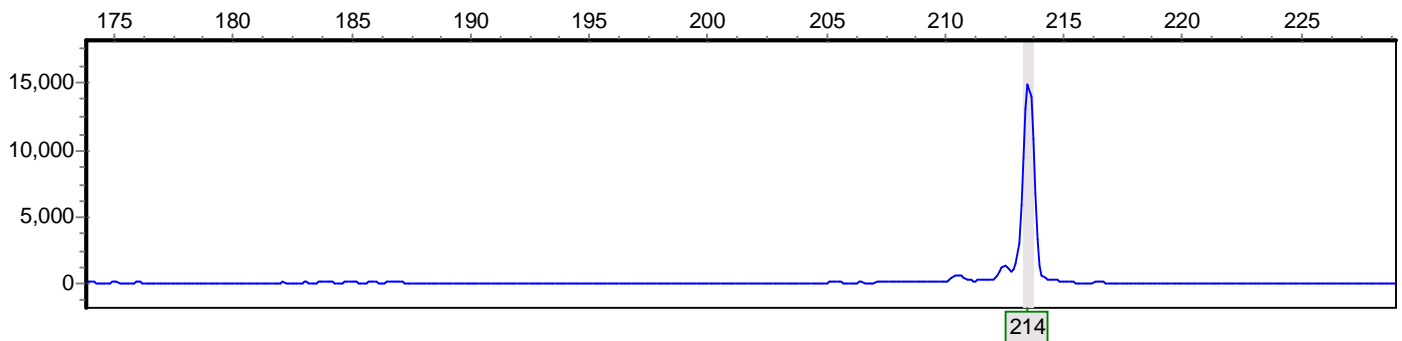

**Sample 1:** sorsc3-01.G01.fsa Run date and time: 03/19/2017 - 18:17:56 -> 03/19/2017 - 19:01:55

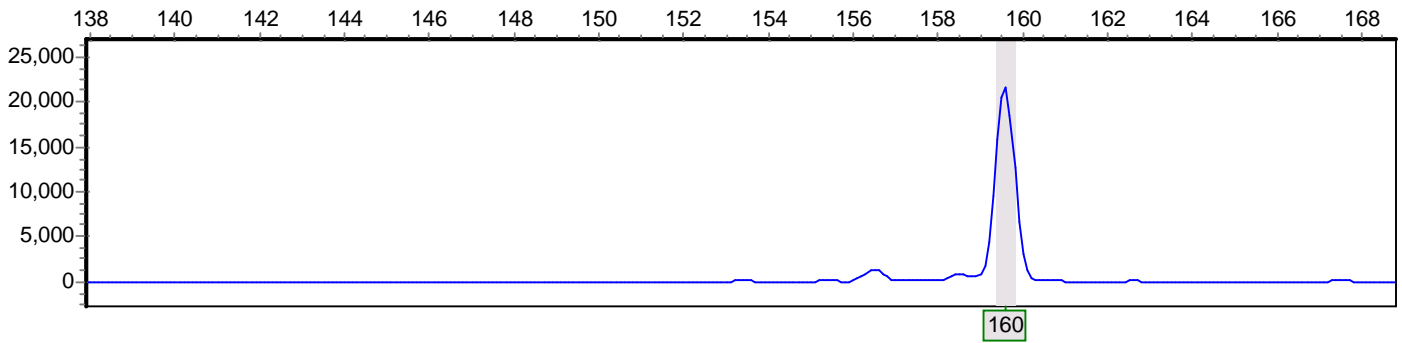

**Sample 2:** sorsc3-04.H01.fsa Run date and time: 03/19/2017 - 18:17:56 -> 03/19/2017 - 19:01:55

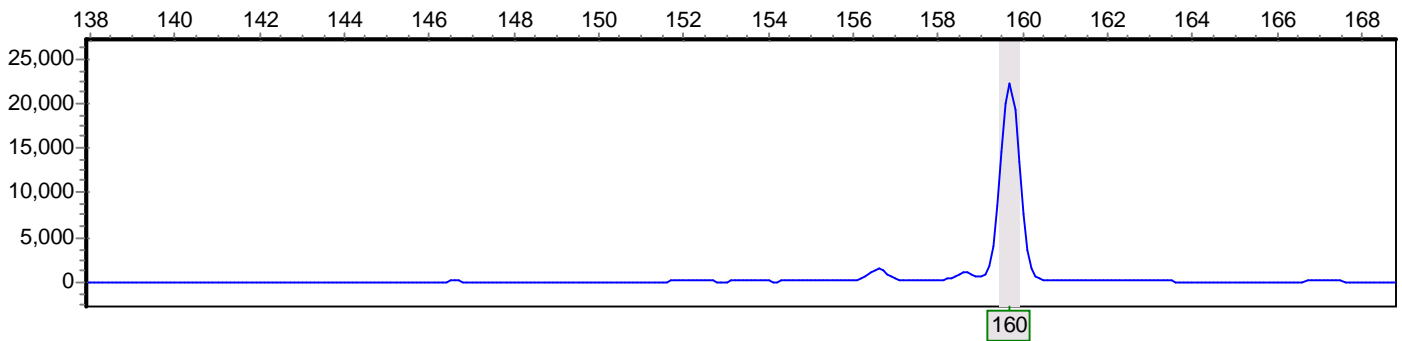

**Sample 3:** sorsc3-05.A04.fsa Run date and time: 03/20/2017 - 21:37:15 -> 03/20/2017 - 22:21:17

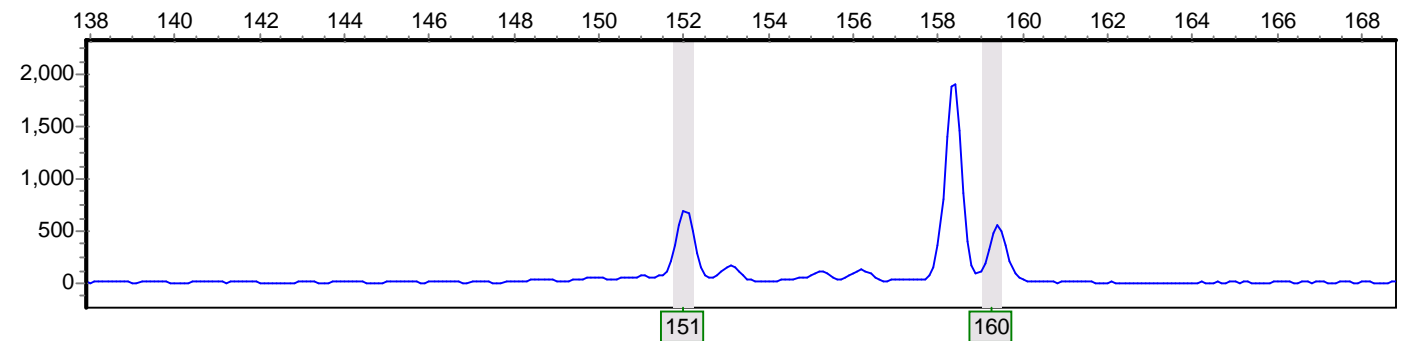

**Sample 4:** sorsc3-06.B04.fsa Run date and time: 03/21/2017 - 13:32:38 -> 03/21/2017 - 14:23:07

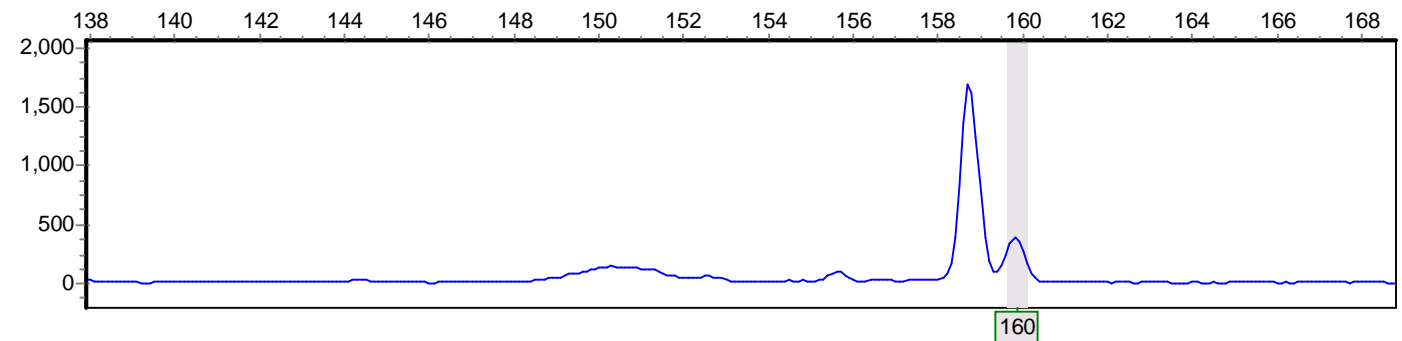

**Sample 5:** sorsc3-07.C04.fsa Run date and time: 03/20/2017 - 21:37:15 -> 03/20/2017 - 22:21:17

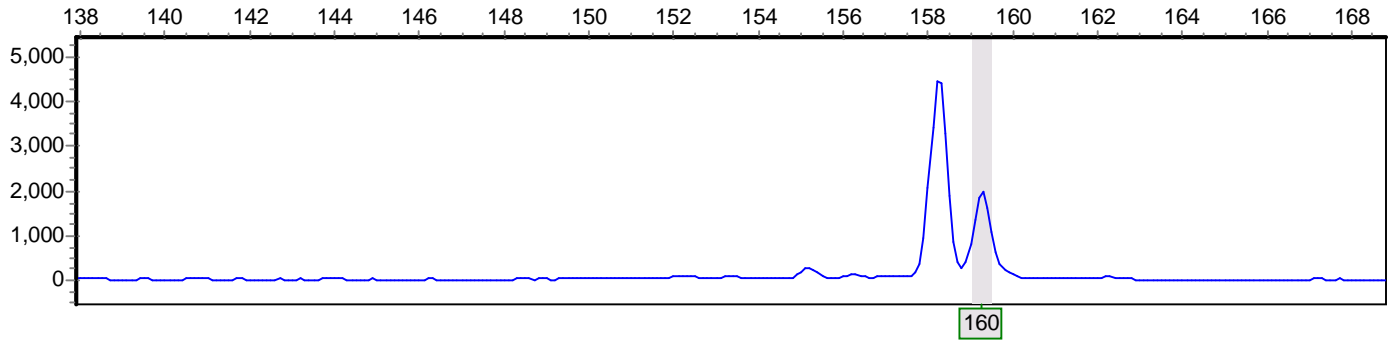

**Sample 6** sorsc3-08-1.E04.fsa Run date and time: 03/20/2017 - 21:37:15 -> 03/20/2017 - 22:21:17

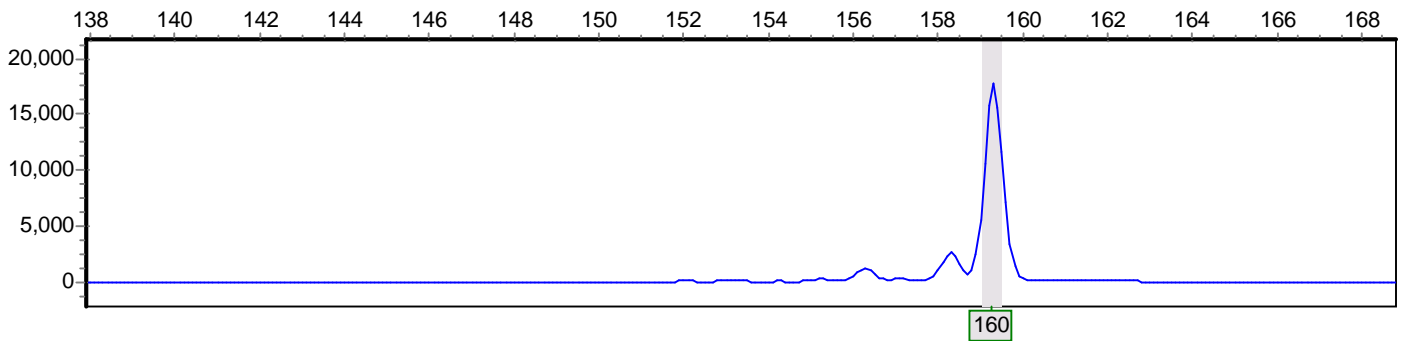

**Sample 7** sorsc3-08.D04.fsa Run date and time: 03/20/2017 - 21:37:15 -> 03/20/2017 - 22:21:17

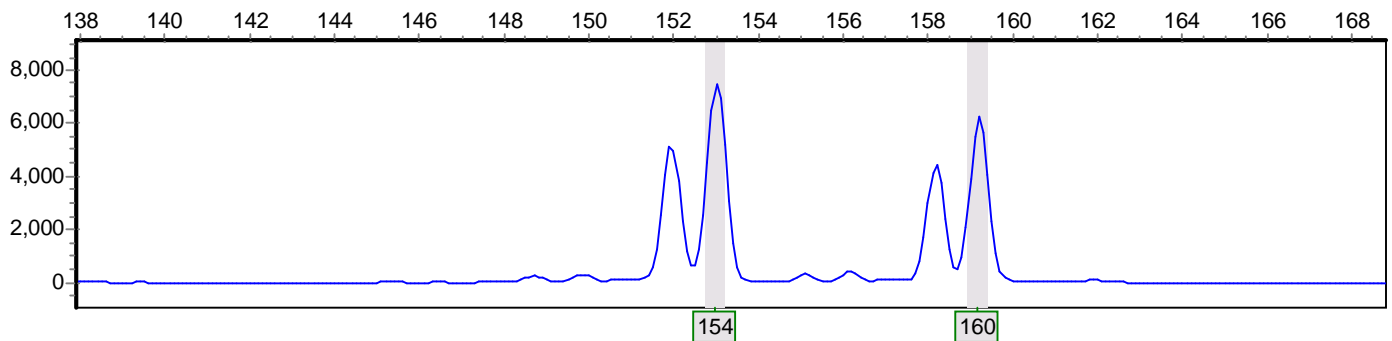

**Sample 8** sorsc3-09.F04.fsa Run date and time: 03/20/2017 - 21:37:15 -> 03/20/2017 - 22:21:17

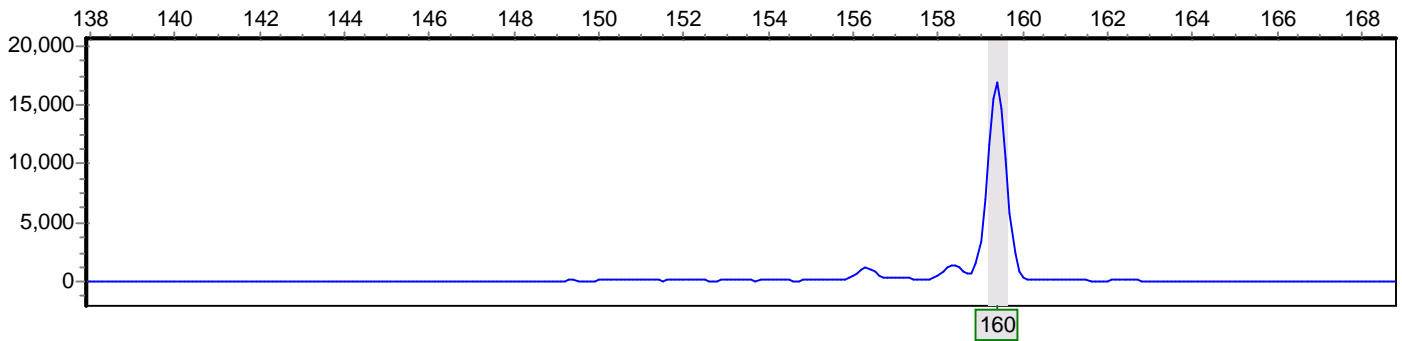

**Sample 1:** sorse2-01.A02.fsa Run date and time: 03/19/2017 - 18:17:56 -> 03/19/2017 - 19:01:55

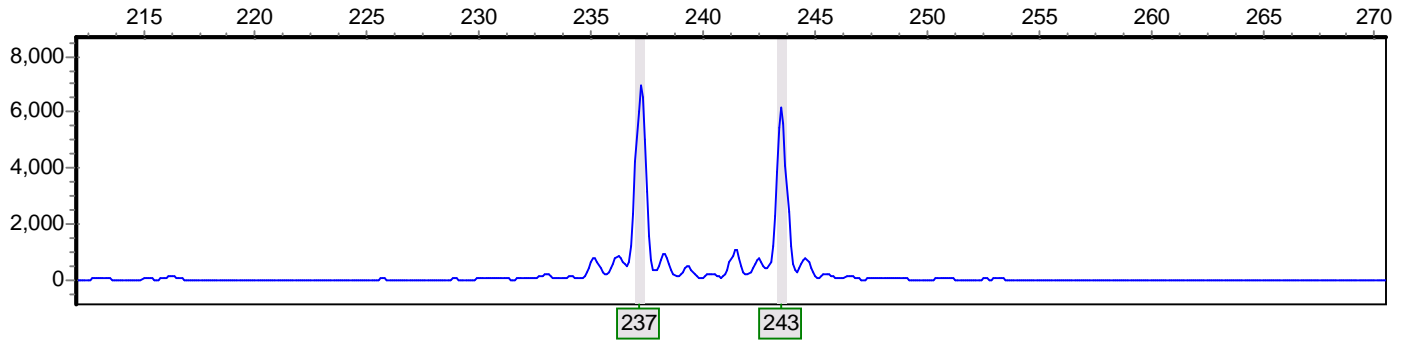

**Sample 2** sorse2-04.B02.fsa Run date and time: 03/19/2017 - 18:17:56 -> 03/19/2017 - 19:01:55

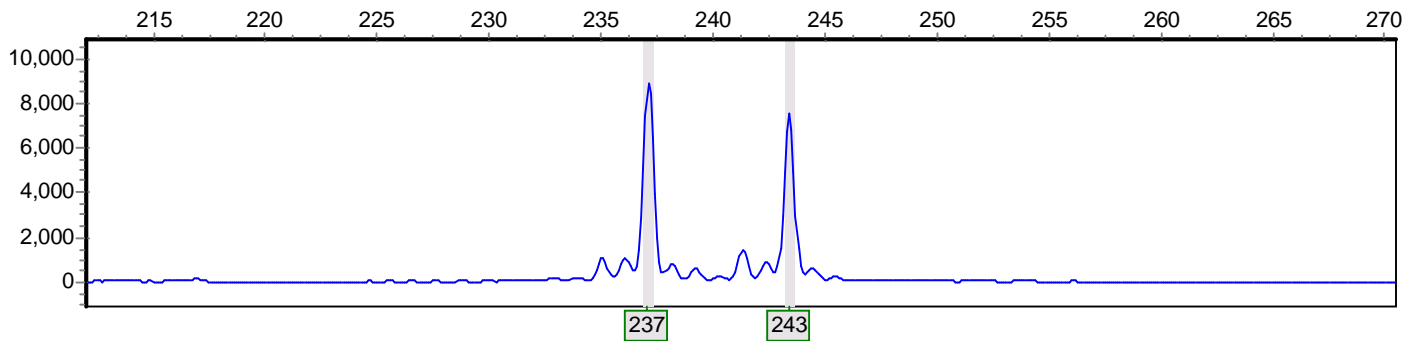

**Sample 3** sorse2-05.A05.fsa Run date and time: 03/20/2017 - 21:37:15 -> 03/20/2017 - 22:21:17

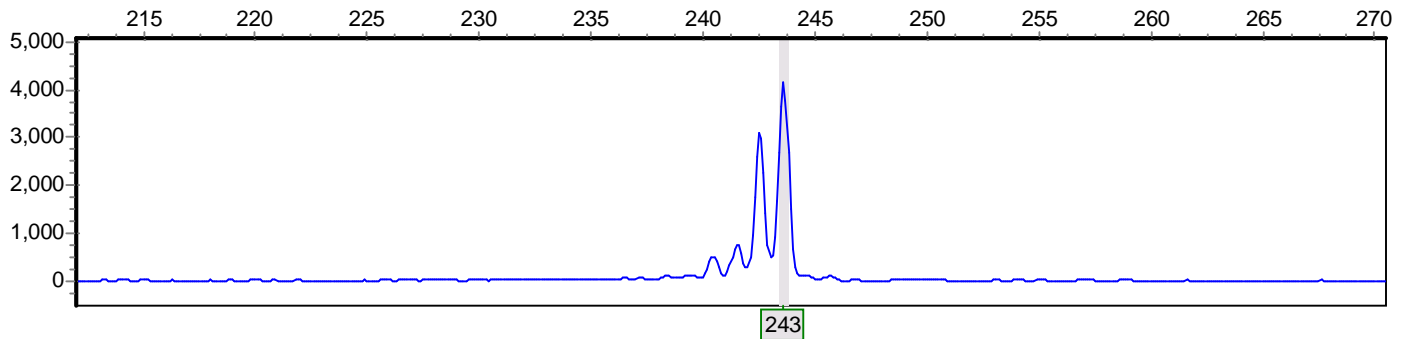

**Sample 4** sorse2-06.B05.fsa Run date and time: 03/20/2017 - 21:37:15 -> 03/20/2017 - 22:21:17

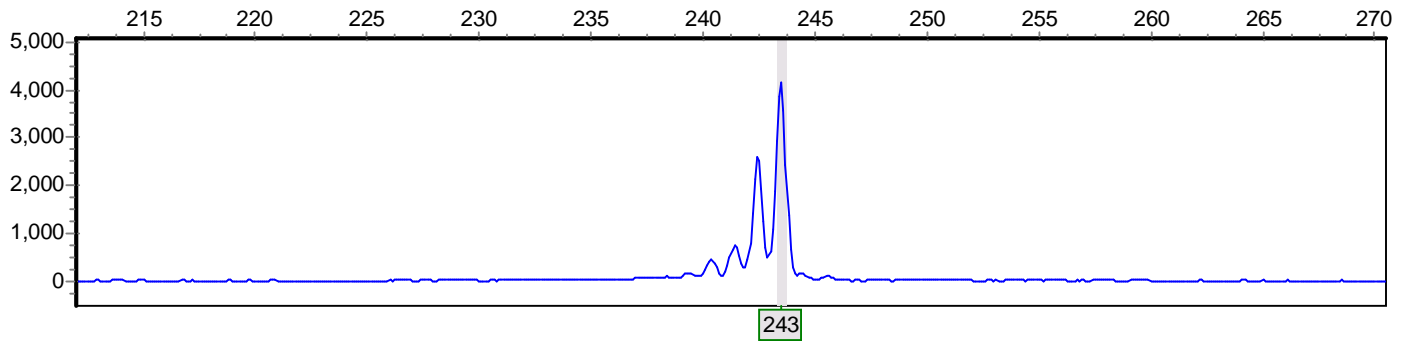

**Sample 5:** sorse2-07.C05.fsa Run date and time: 03/20/2017 - 21:37:15 -> 03/20/2017 - 22:21:17

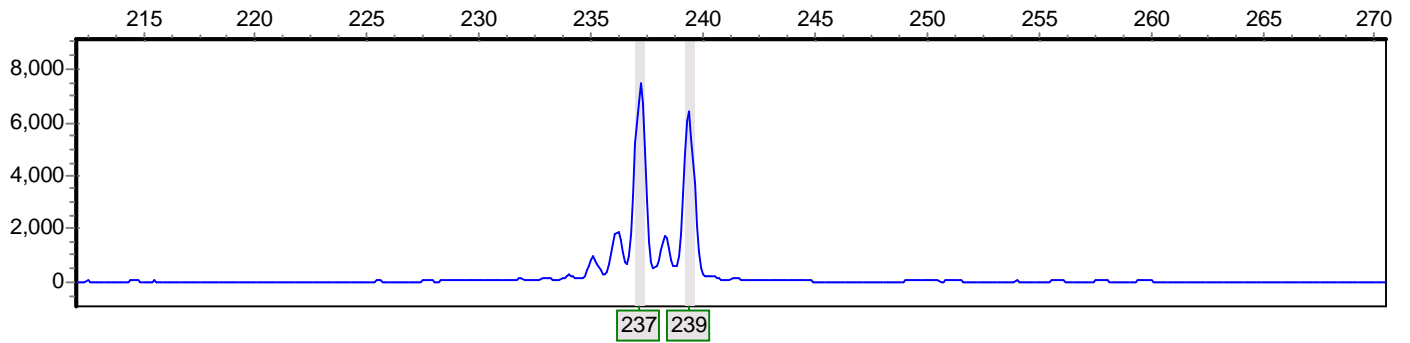

**Sample 6** sorse2-08-1.E05.fsa Run date and time: 03/21/2017 - 13:32:38 -> 03/21/2017 - 14:23:07

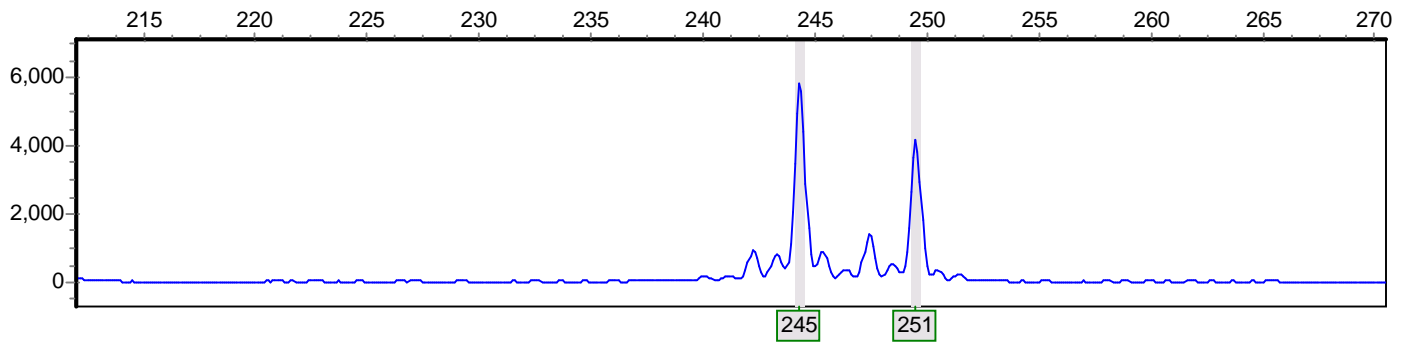

**Sample 7** sorse2-08.D05.fsa Run date and time: 03/20/2017 - 21:37:15 -> 03/20/2017 - 22:21:17

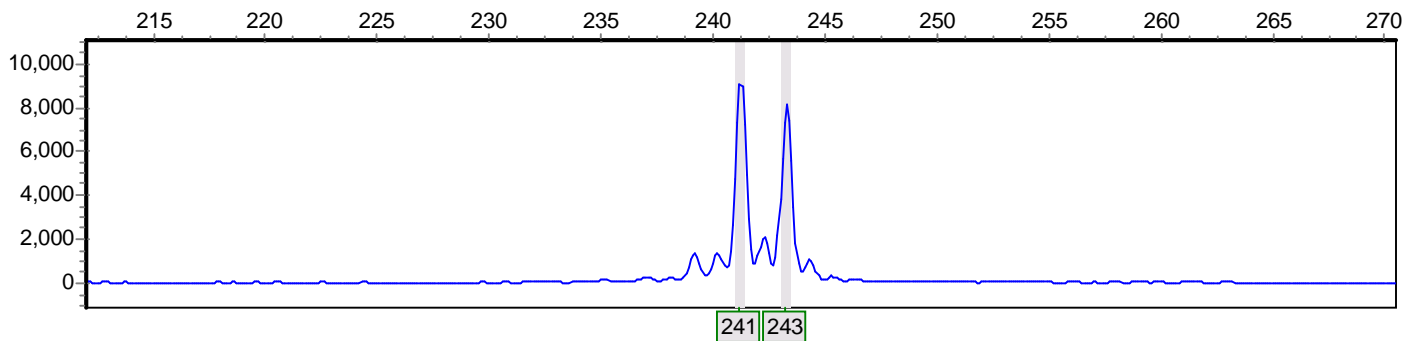

**Sample 8** sorse2-09.F05.fsa Run date and time: 03/21/2017 - 13:32:38 -> 03/21/2017 - 14:23:07

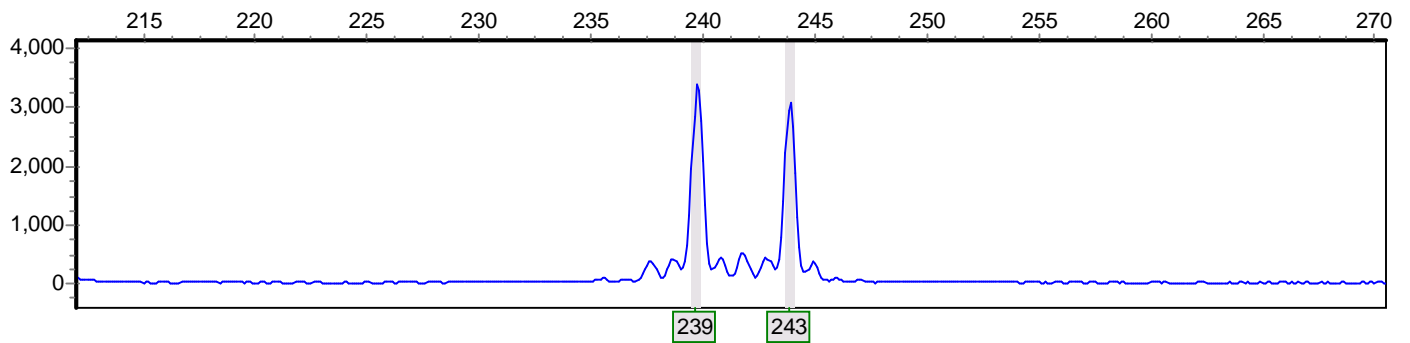



Sample 1: sorse5-01.A07.fsa Run date and time: 03/20/2017 - 21:37:15 -> 03/20/2017 - 22:21:17

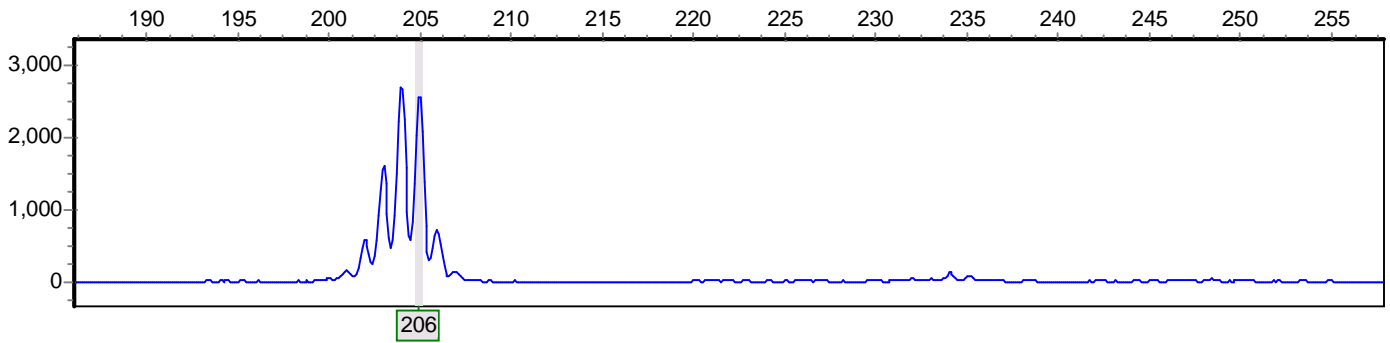

Sample 2: sorse5-04.B07.fsa Run date and time: 03/21/2017 - 13:32:38 -> 03/21/2017 - 14:23:07

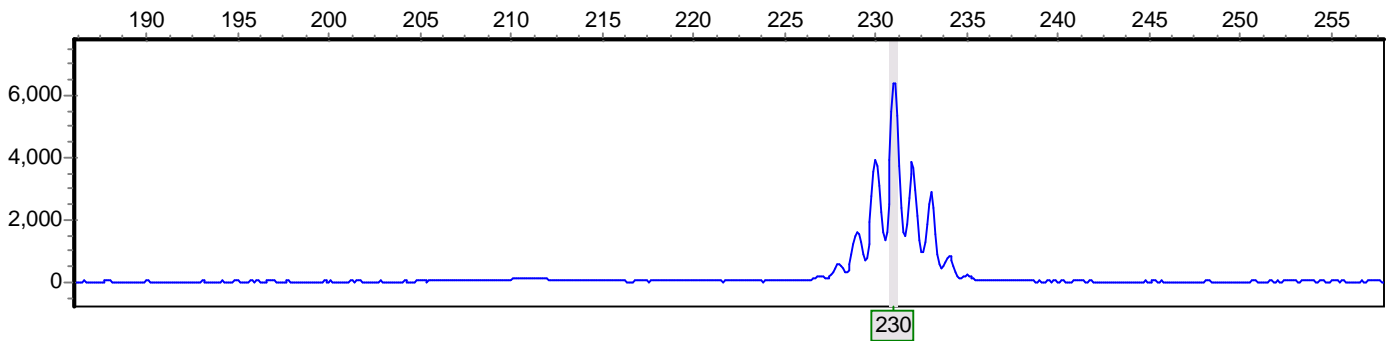

Sample 3: sorse5-05.C03.fsa Run date and time: 03/19/2017 - 18:17:56 -> 03/19/2017 - 19:01:55

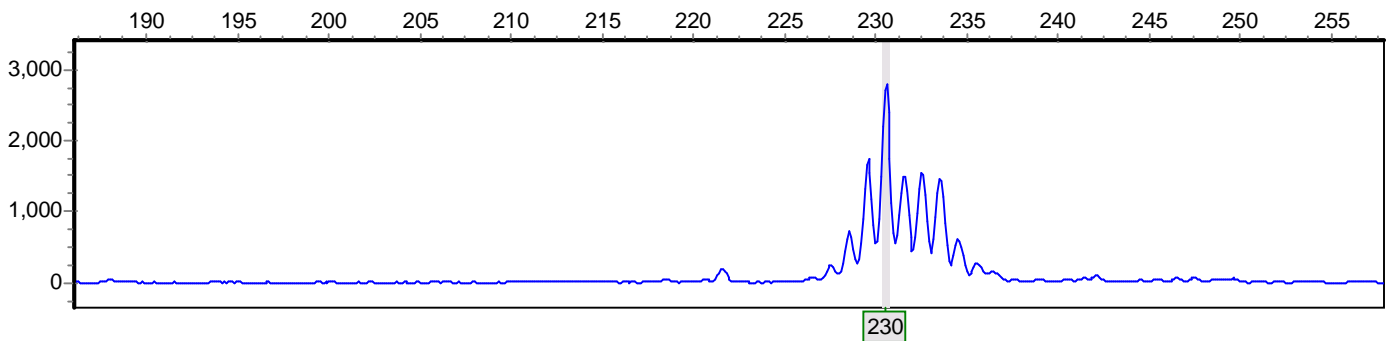

Sample 4: sorse5-06.D03.fsa Run date and time: 03/19/2017 - 18:17:56 -> 03/19/2017 - 19:01:55

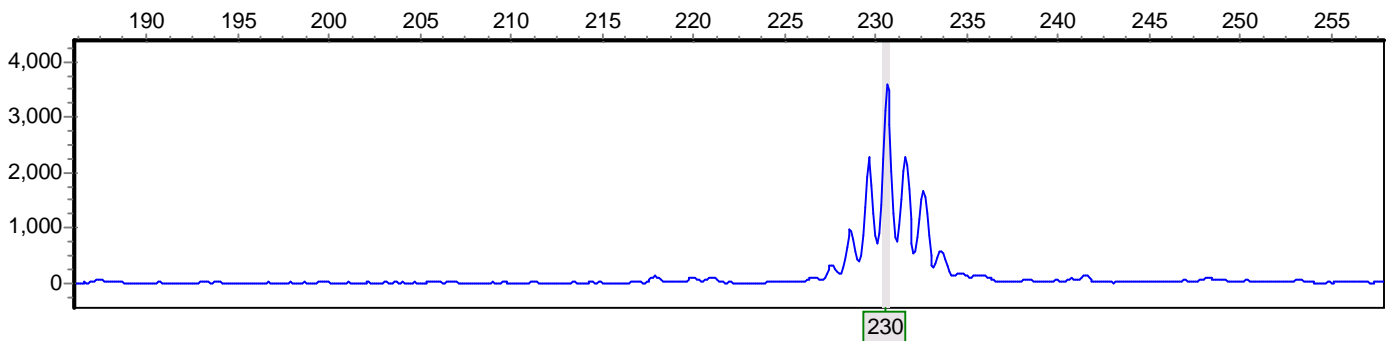

**Sample 5:** sorse5-07.C07.fsa Run date and time: 03/20/2017 - 21:37:15 -> 03/20/2017 - 22:21:17

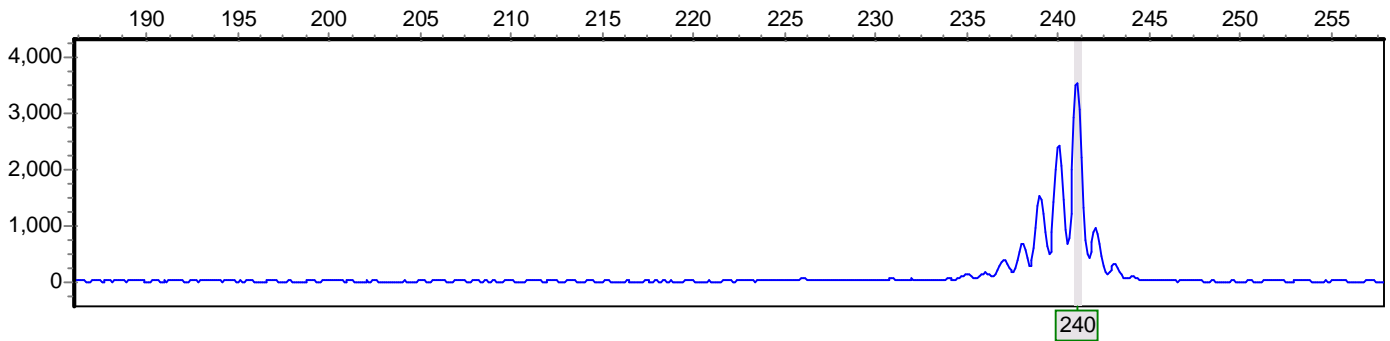

**Sample 6** sorse5-08-1.E07.fsa Run date and time: 03/20/2017 - 21:37:15 -> 03/20/2017 - 22:21:17

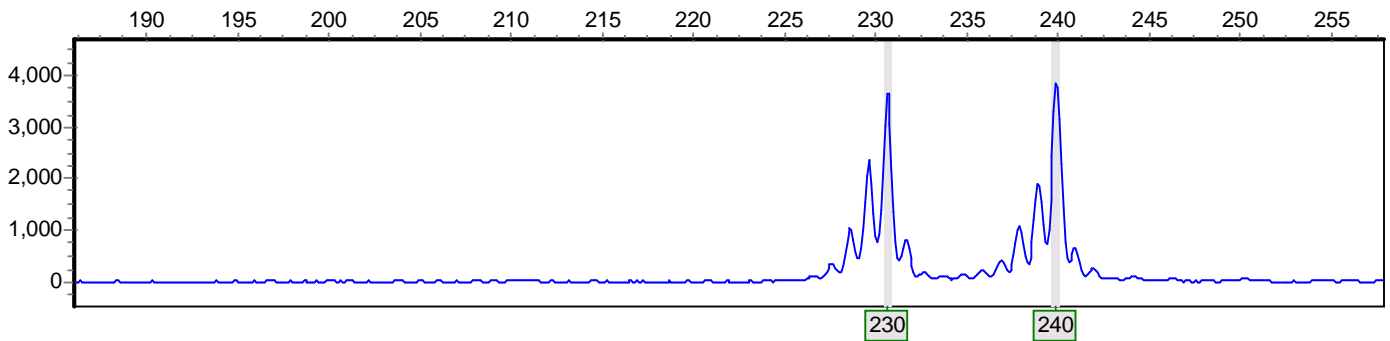

**Sample 7** sorse5-08.D07.fsa Run date and time: 03/20/2017 - 21:37:15 -> 03/20/2017 - 22:21:17

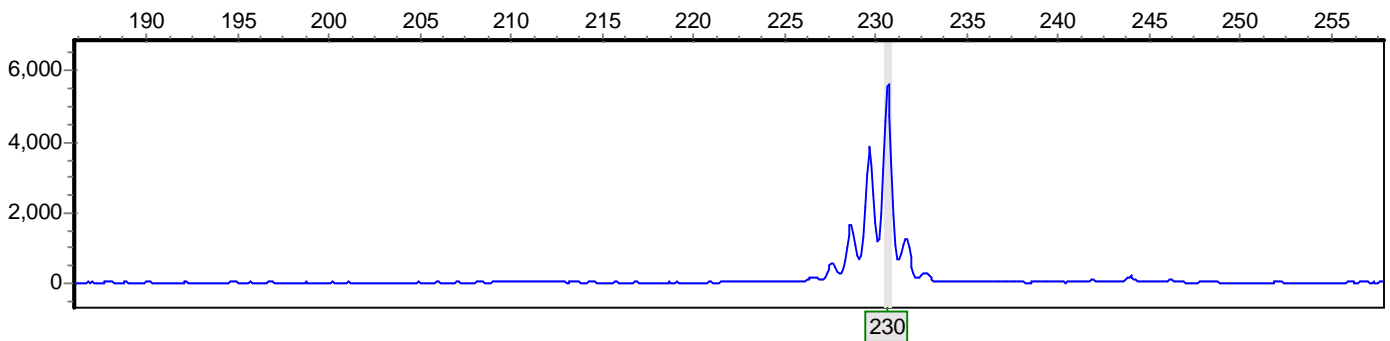

**Sample 8** sorse5-09.F07.fsa Run date and time: 03/20/2017 - 21:37:15 -> 03/20/2017 - 22:21:17

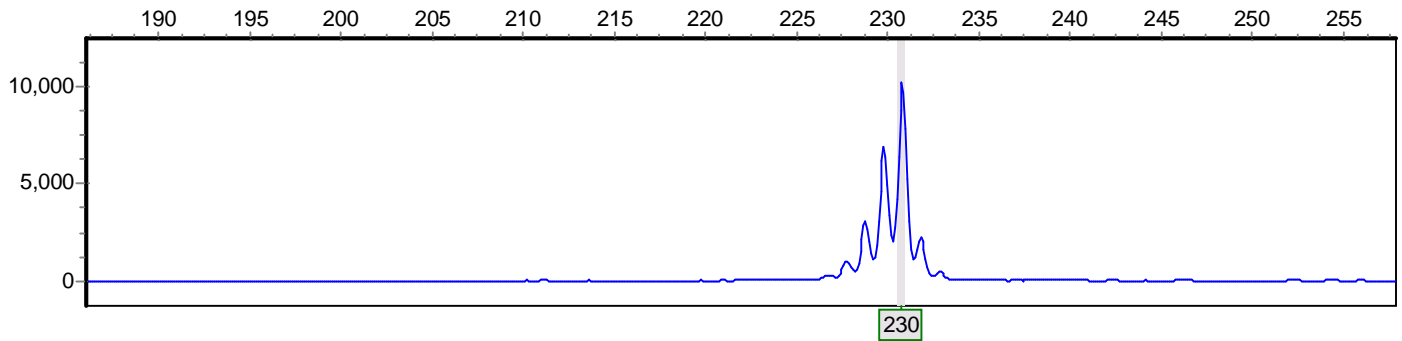

**Sample 1:** sorse10-01.A08.fsa Run date and time: 03/20/2017 - 21:37:15 -> 03/20/2017 - 22:21:17

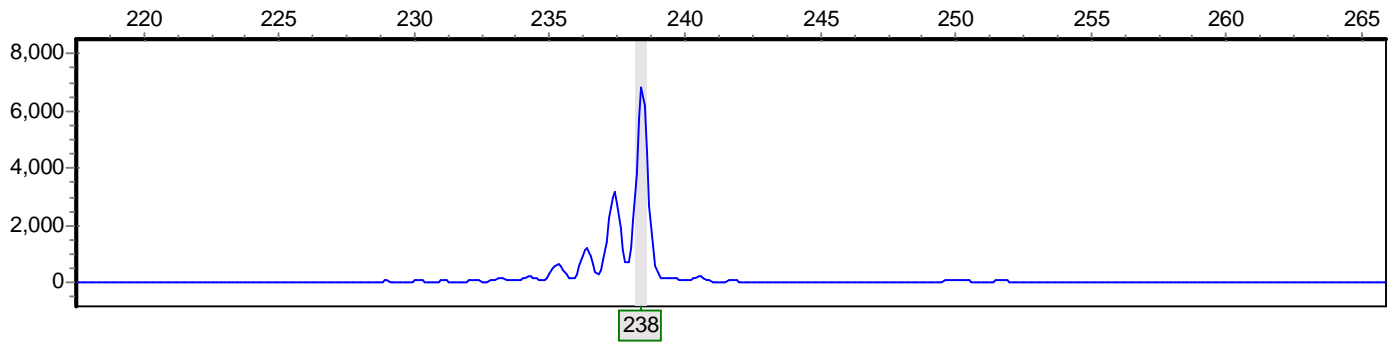

**Sample 2:** sorse10-04.B08.fsa Run date and time: 03/20/2017 - 21:37:15 -> 03/20/2017 - 22:21:17

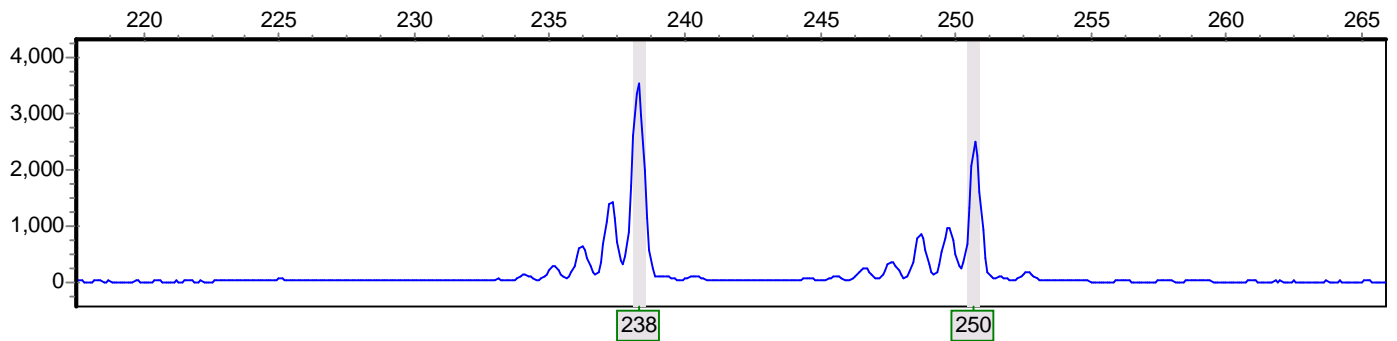

**Sample 3:** sorse10-05.E03.fsa Run date and time: 03/19/2017 - 18:17:56 -> 03/19/2017 - 19:01:55

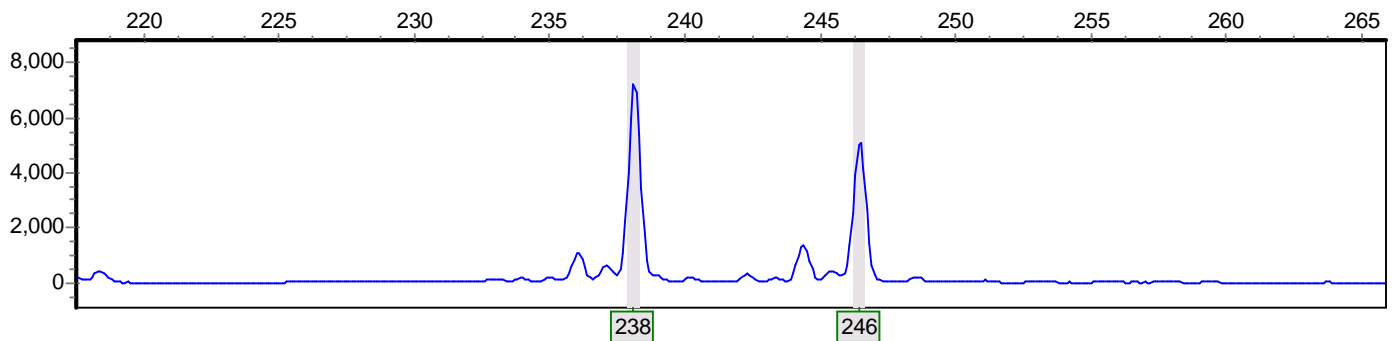

**Sample 4:** sorse10-06.F03.fsa Run date and time: 03/19/2017 - 18:17:56 -> 03/19/2017 - 19:01:55

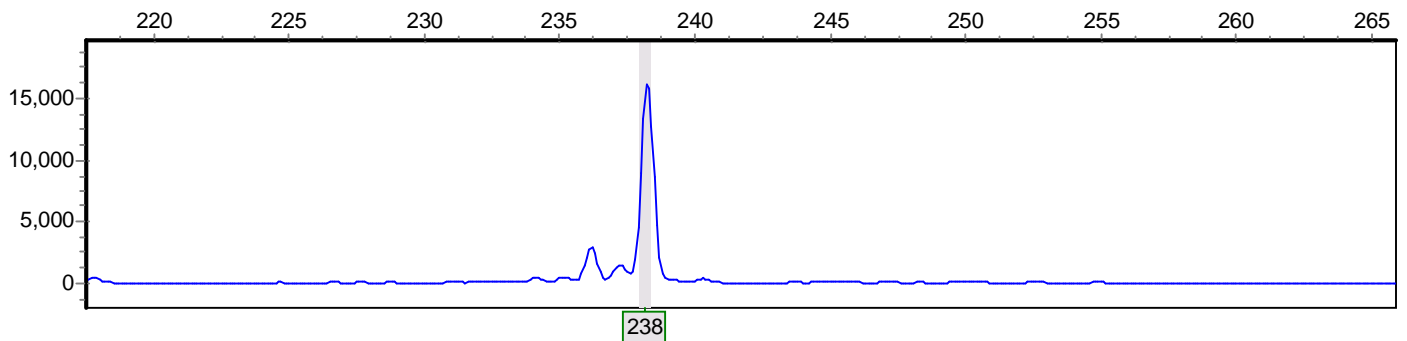

Sample 5: sorse10-07.C08.fsa Run date and time: 03/20/2017 - 21:37:15 -> 03/20/2017 - 22:21:17

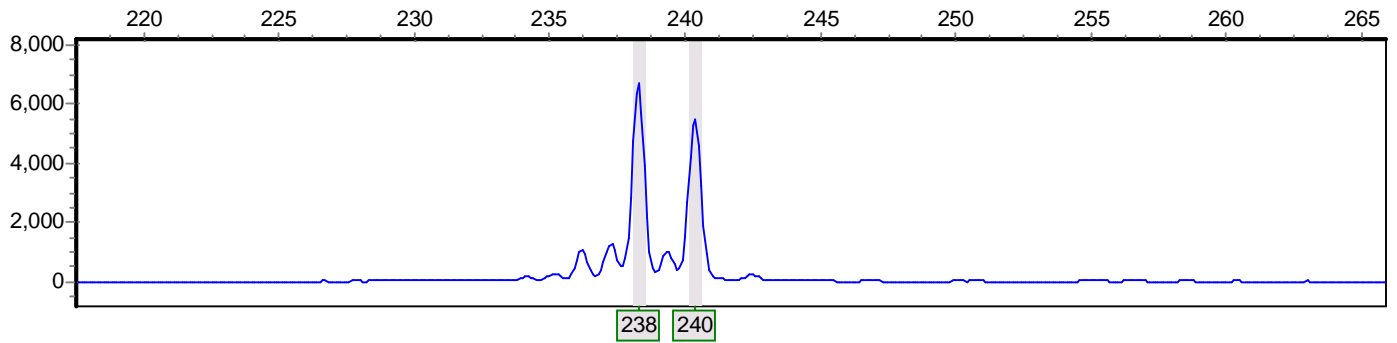

Sample 6 sorse10-08-1.E08.fsa Run date and time: 03/20/2017 - 21:37:15 -> 03/20/2017 - 22:21:17

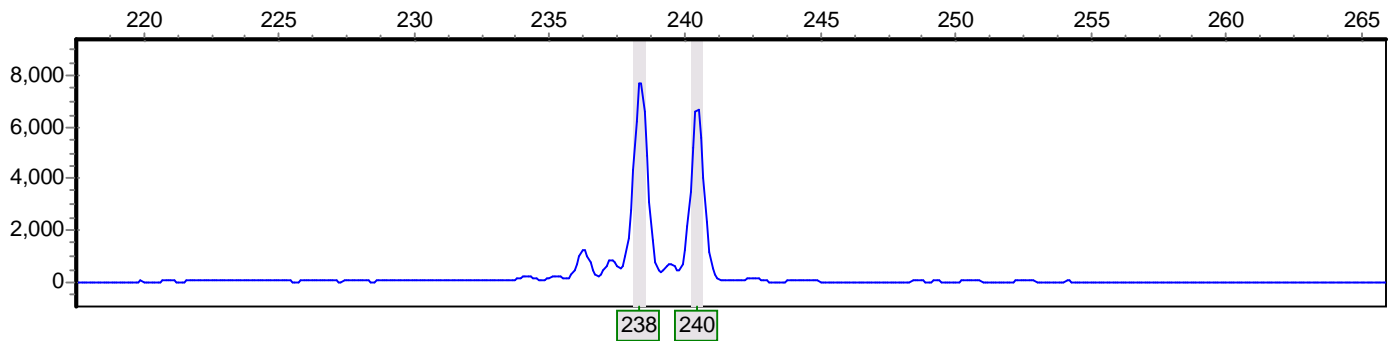

Sample 7 sorse10-08.D08.fsa Run date and time: 03/20/2017 - 21:37:15 -> 03/20/2017 - 22:21:17

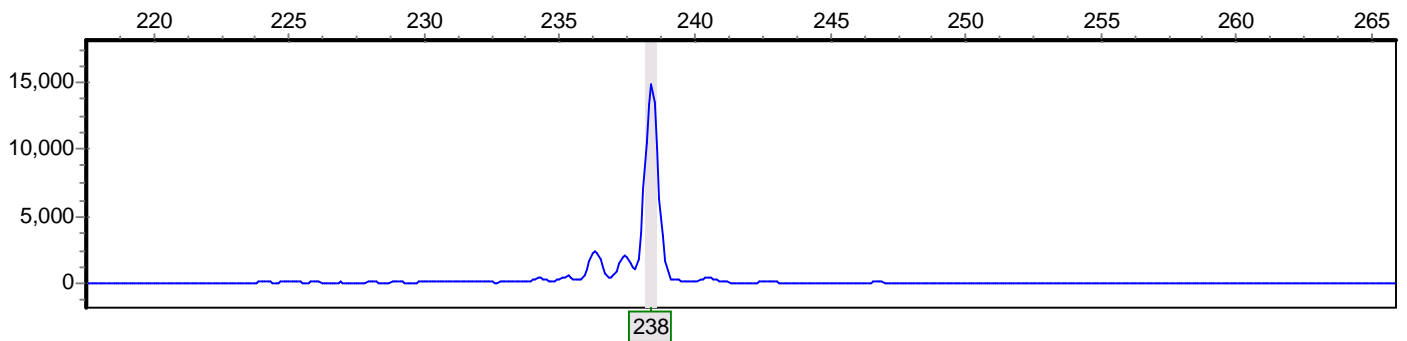

Sample 8 sorse10-09.F08.fsa Run date and time: 03/20/2017 - 21:37:15 -> 03/20/2017 - 22:21:17

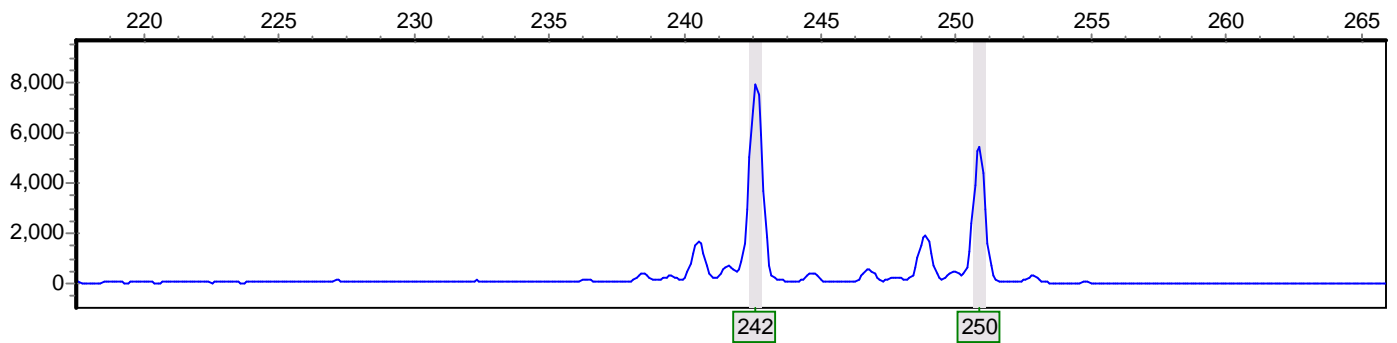

**Sample 1:** sorse17-01.A09.fsa Run date and time: 03/20/2017 - 21:37:15 -> 03/20/2017 - 22:21:17

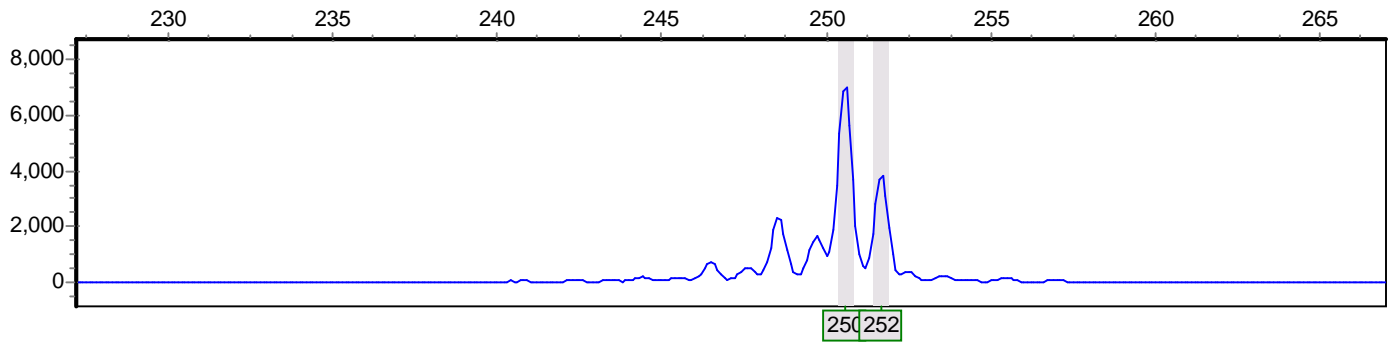

**Sample 2** sorse17-04.B09.fsa Run date and time: 03/20/2017 - 21:37:15 -> 03/20/2017 - 22:21:17

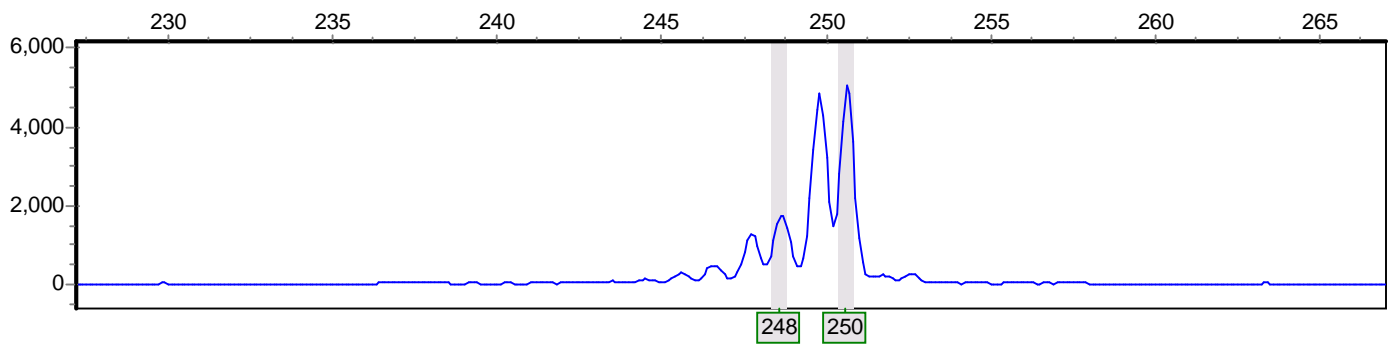

**Sample 3** sorse17-05.G03.fsa Run date and time: 03/19/2017 - 18:17:56 -> 03/19/2017 - 19:01:55

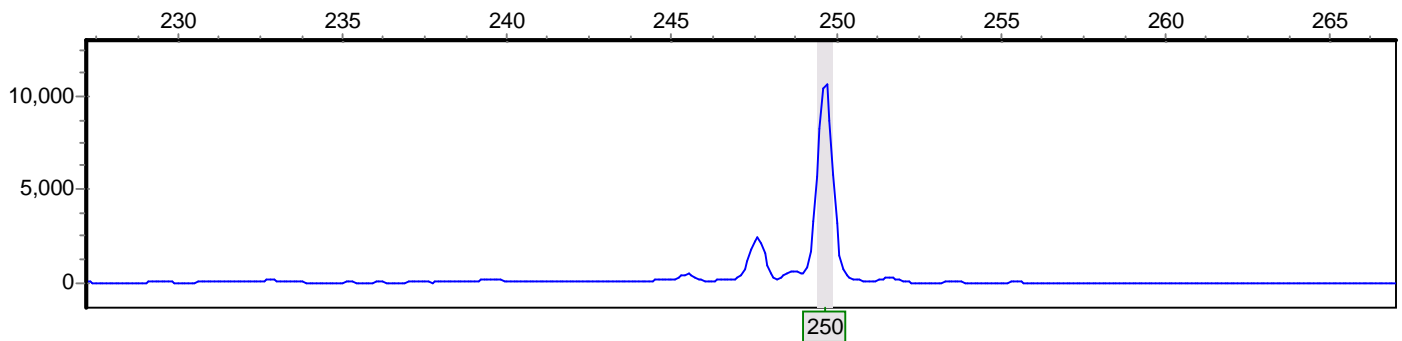

**Sample 4** sorse17-06.H03.fsa Run date and time: 03/19/2017 - 18:17:56 -> 03/19/2017 - 19:01:55

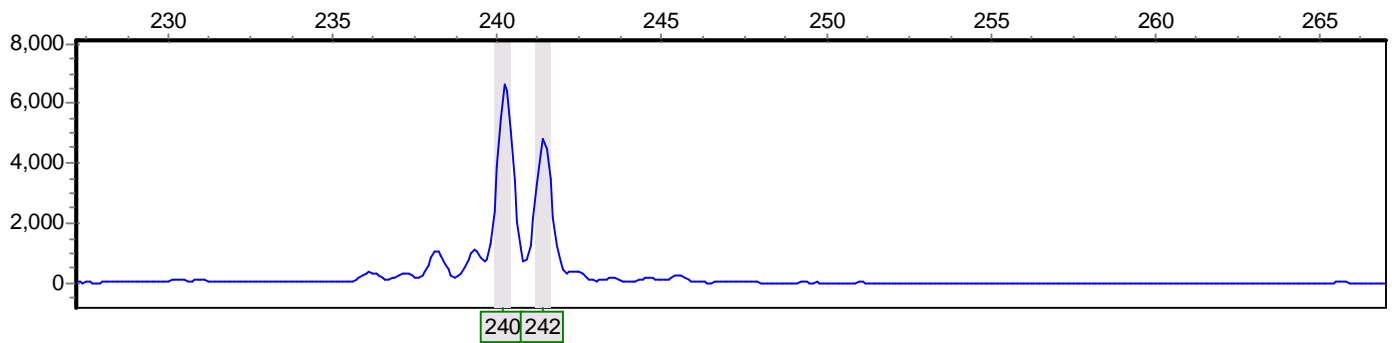

Sample 5: sorse17-07.C09.fsa Run date and time: 03/20/2017 - 21:37:15 -> 03/20/2017 - 22:21:17

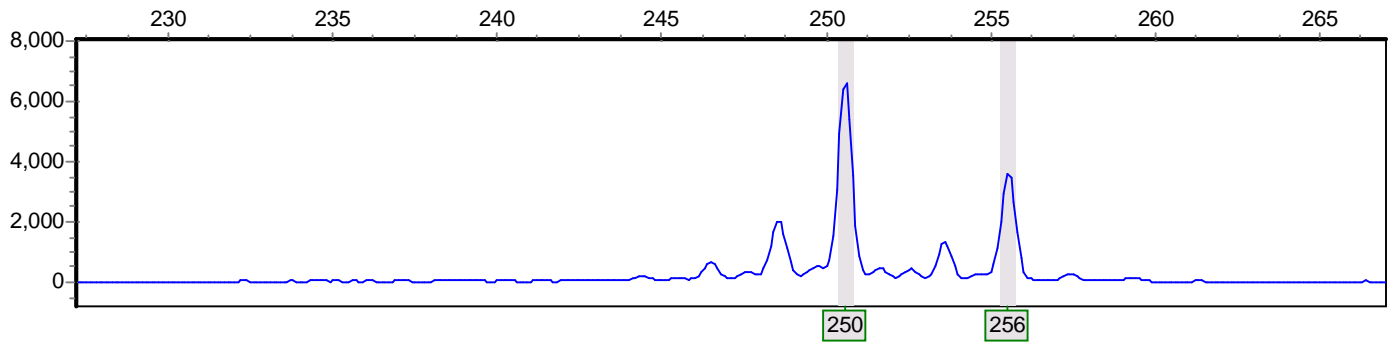

Sample 6 sorse17-08-1.E09.fsa Run date and time: 03/20/2017 - 21:37:15 -> 03/20/2017 - 22:21:17

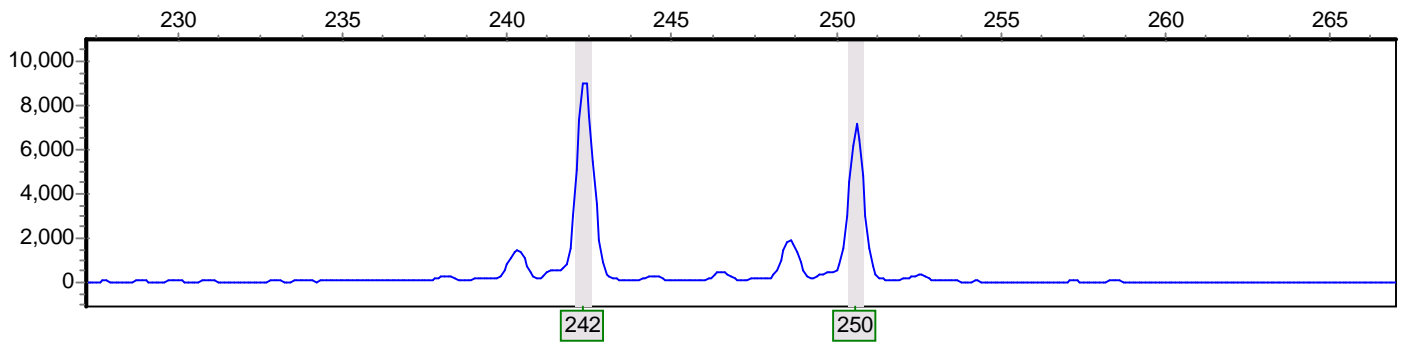

Sample 7 sorse17-08.D09.fsa Run date and time: 03/20/2017 - 21:37:15 -> 03/20/2017 - 22:21:17

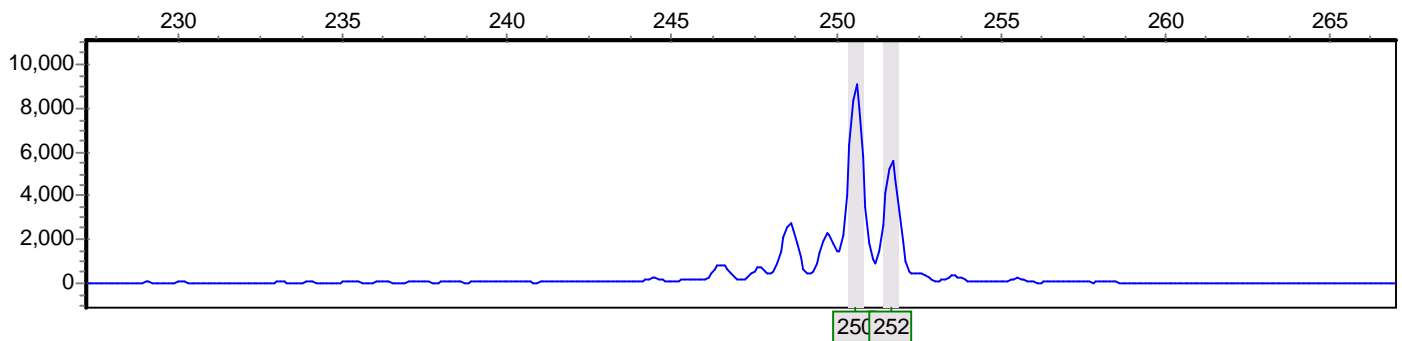

Sample 8 sorse17-09.F09.fsa Run date and time: 03/20/2017 - 21:37:15 -> 03/20/2017 - 22:21:17

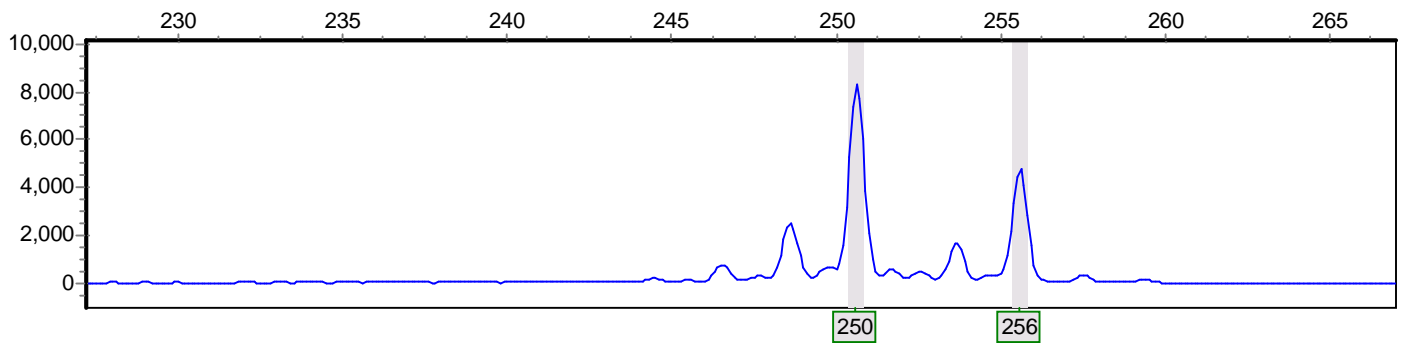

**Sample 1:** sorse19-01.A10.fsa Run date and time: 03/20/2017 - 21:37:15 -> 03/20/2017 - 22:21:17

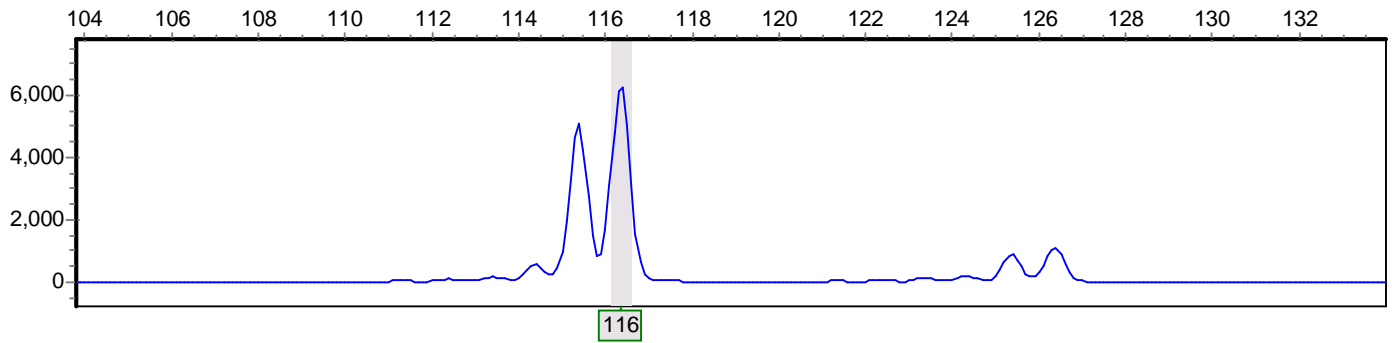

**Sample 2:** sorse19-04.B10.fsa Run date and time: 03/20/2017 - 21:37:15 -> 03/20/2017 - 22:21:17

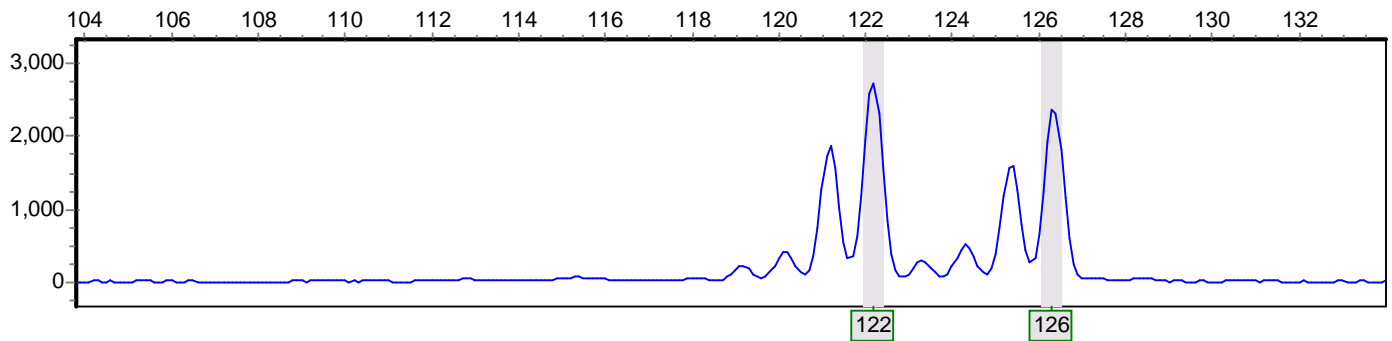

**Sample 3:** sorse19-05.C02.fsa Run date and time: 03/19/2017 - 18:17:56 -> 03/19/2017 - 19:01:55

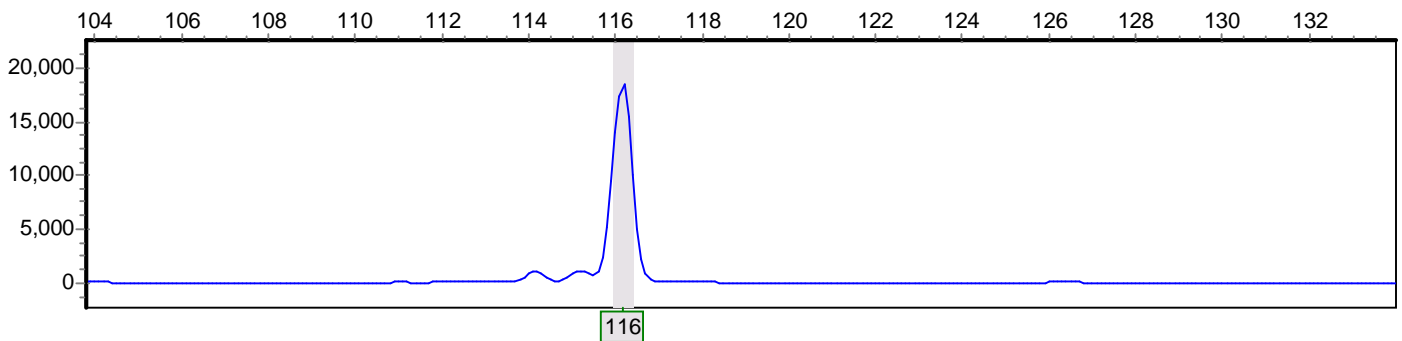

**Sample 4:** sorse19-06.D02.fsa Run date and time: 03/19/2017 - 18:17:56 -> 03/19/2017 - 19:01:55

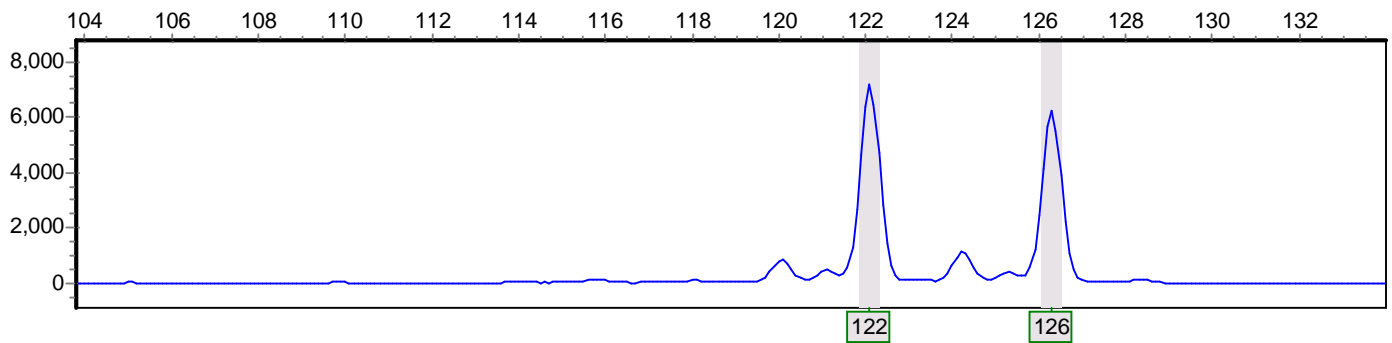

Sample 5: sorse19-07.C10.fsa Run date and time: 03/20/2017 - 21:37:15 -> 03/20/2017 - 22:21:17

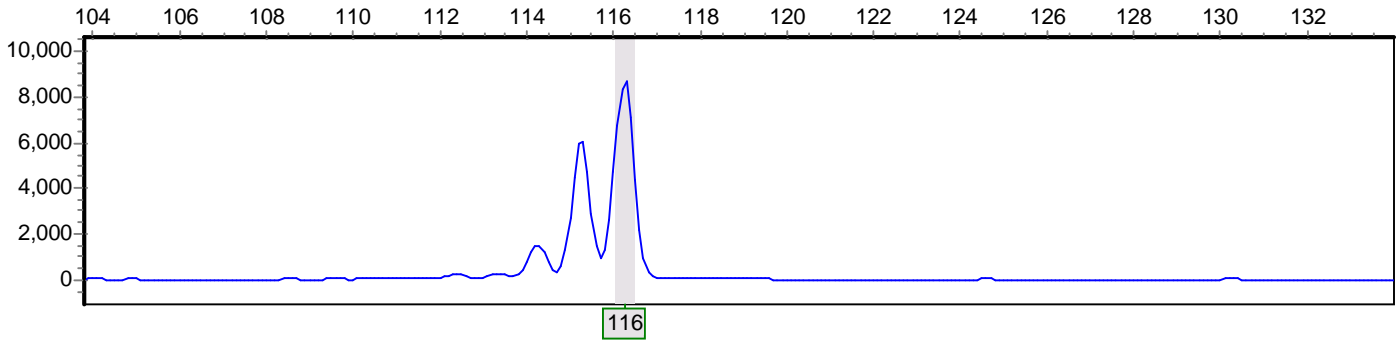

Sample 6 sorse19-08-1.E10.fsa Run date and time: 03/20/2017 - 21:37:15 -> 03/20/2017 - 22:21:17

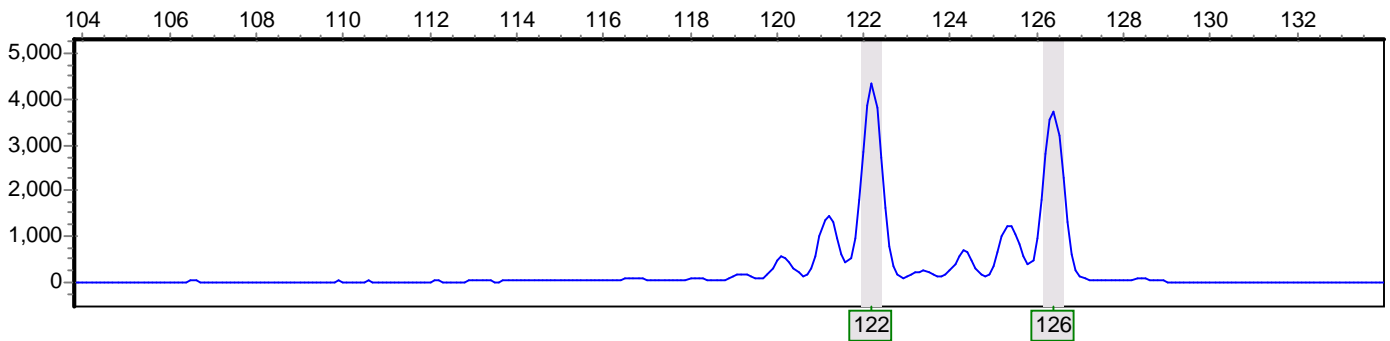

Sample 7 sorse19-08.D10.fsa Run date and time: 03/20/2017 - 21:37:15 -> 03/20/2017 - 22:21:17

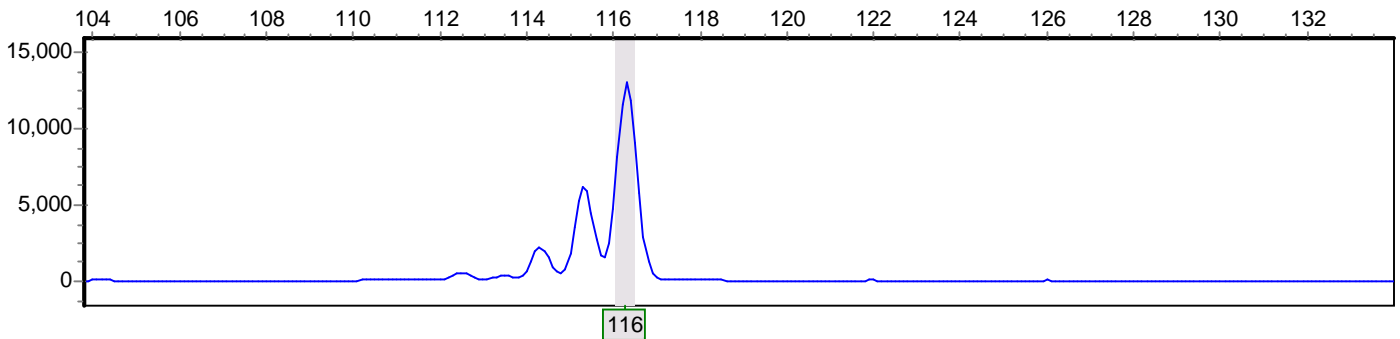

Sample 8 sorse19-09.F10.fsa Run date and time: 03/20/2017 - 21:37:15 -> 03/20/2017 - 22:21:17

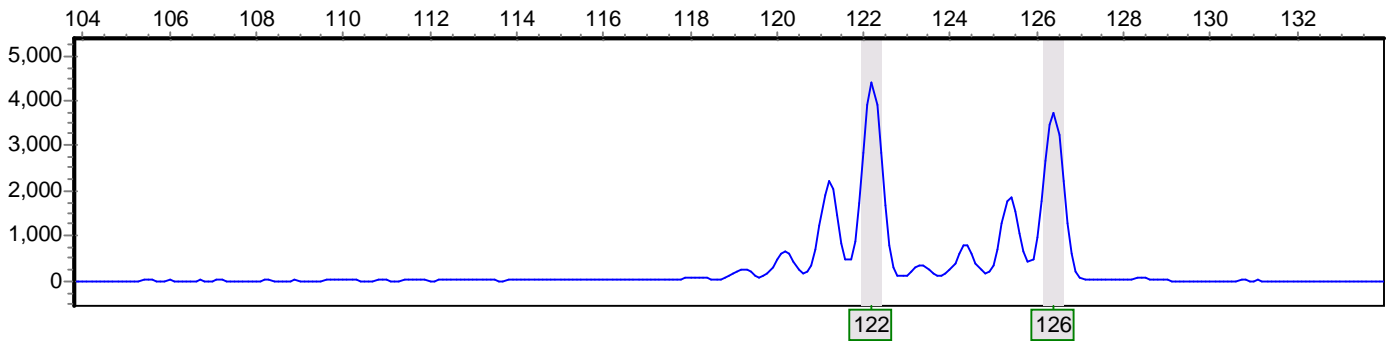



**Sample 1:** sorse50-01.A12.fsa Run date and time: 03/21/2017 - 13:32:38 -> 03/21/2017 - 14:23:07

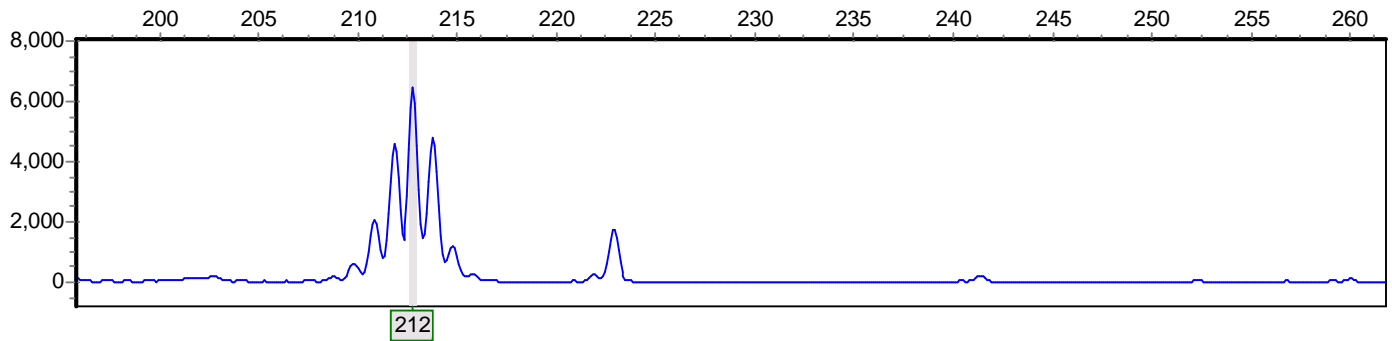

**Sample 2** sorse50-04.B12.fsa Run date and time: 03/20/2017 - 21:37:15 -> 03/20/2017 - 22:21:17

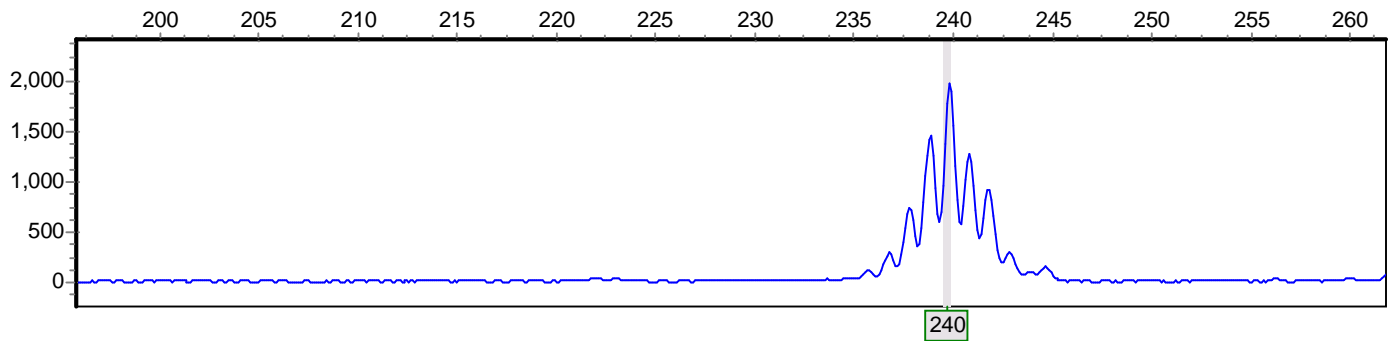

**Sample 3** sorse50-05.C12.fsa Run date and time: 03/20/2017 - 21:37:15 -> 03/20/2017 - 22:21:17

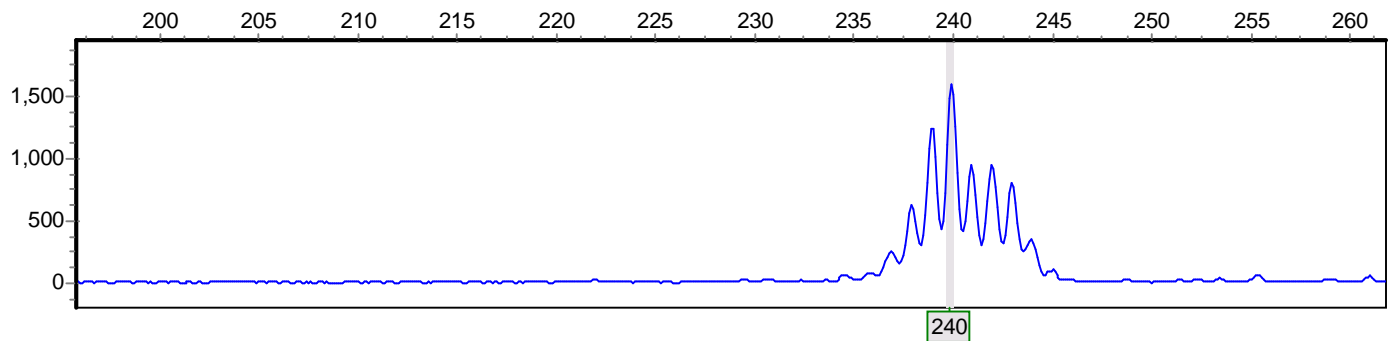

**Sample 4** sorse50-06.D12.fsa Run date and time: 03/20/2017 - 21:37:15 -> 03/20/2017 - 22:21:17

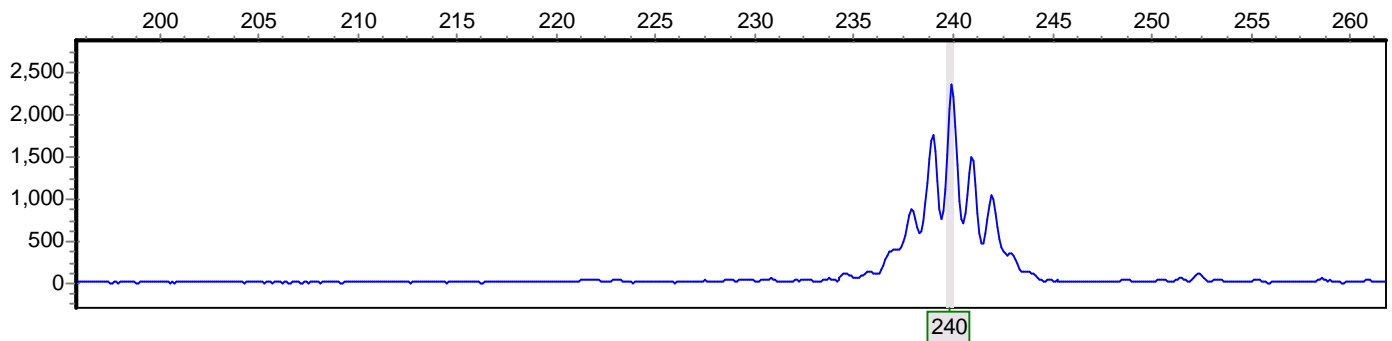

**Sample 5:** sorse50-07.C04.fsa Run date and time: 03/19/2017 - 18:17:56 -> 03/19/2017 - 19:01:55

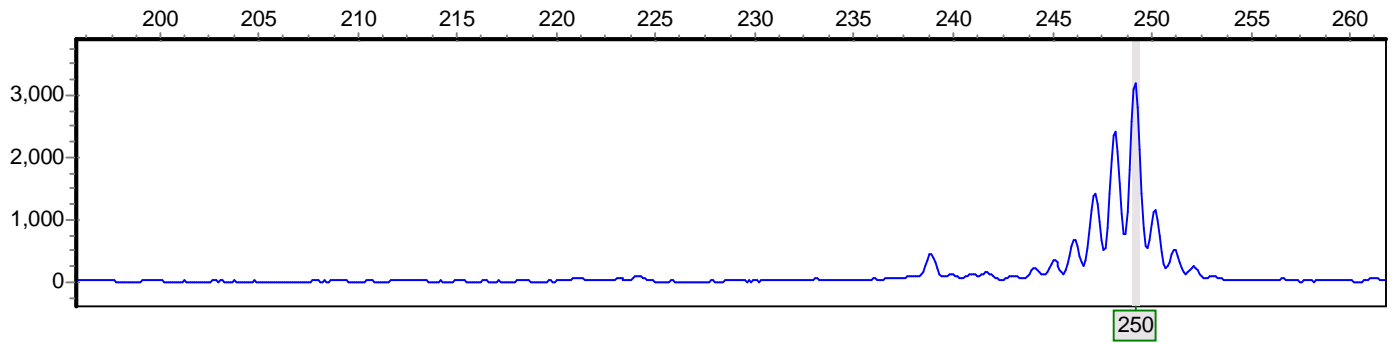

**Sample 6** sorse50-08-1.E12.fsa Run date and time: 03/20/2017 - 21:37:15 -> 03/20/2017 - 22:21:17

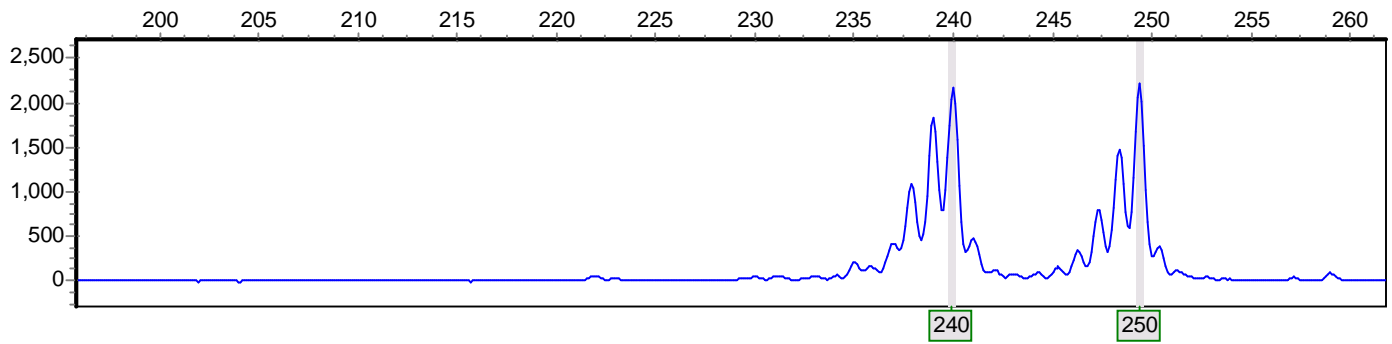

**Sample 7** sorse50-08.D04.fsa Run date and time: 03/19/2017 - 18:17:56 -> 03/19/2017 - 19:01:55

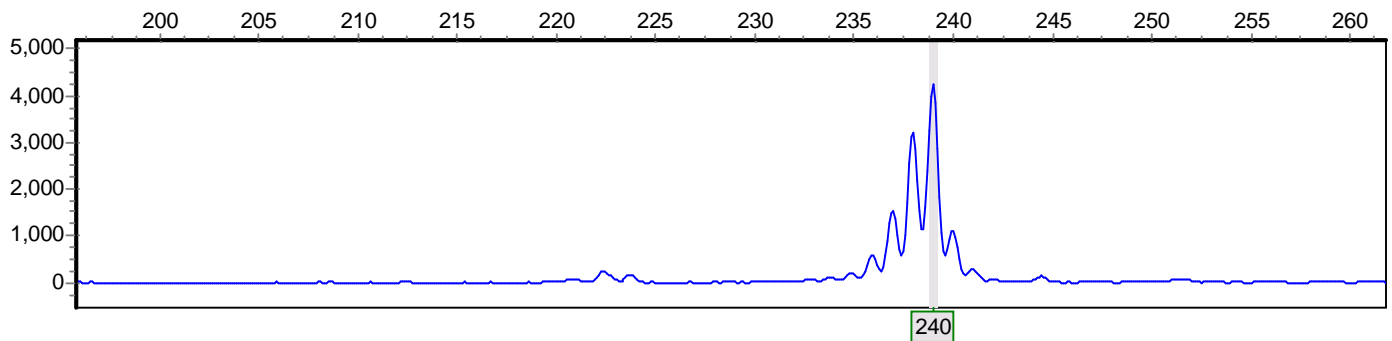

**Sample 8** sorse50-09.F12.fsa Run date and time: 03/20/2017 - 21:37:15 -> 03/20/2017 - 22:21:17

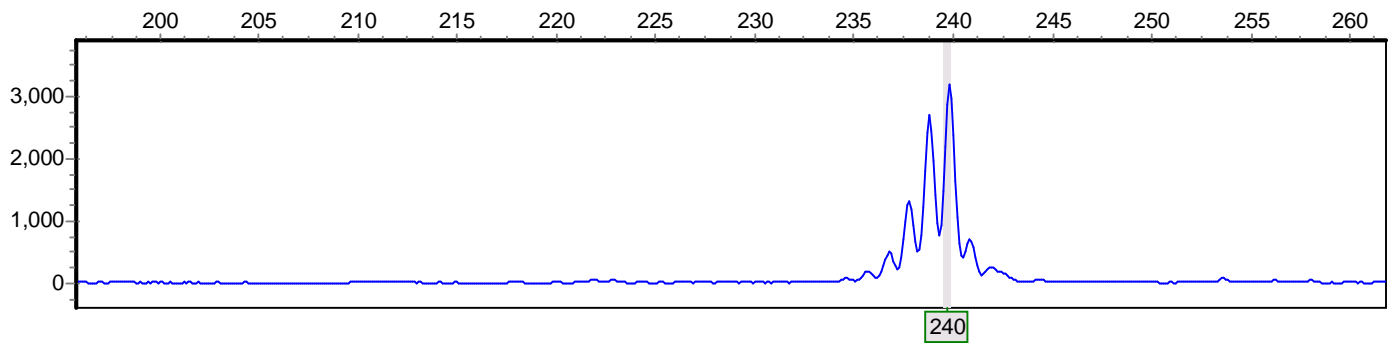

**Sample 1:** sorsg1-01.A01.fsa Run date and time: 03/20/2017 - 22:22:03 -> 03/20/2017 - 23:06:41

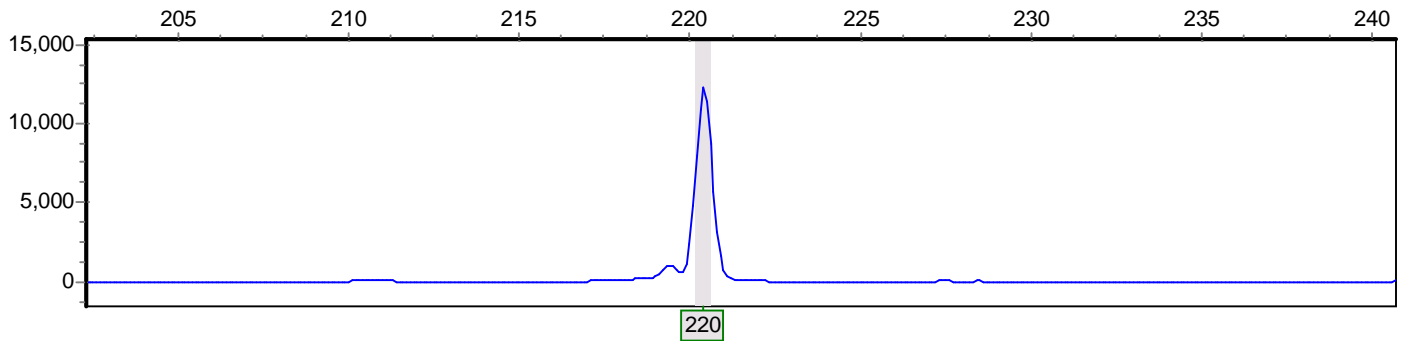

**Sample 2** sorsg1-04.B01.fsa Run date and time: 03/20/2017 - 22:22:03 -> 03/20/2017 - 23:06:41

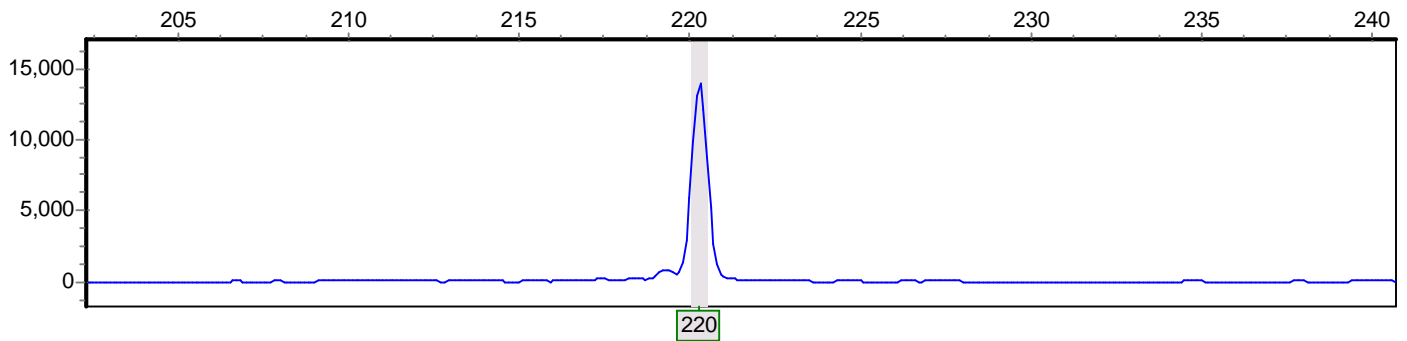

**Sample 3** sorsg1-05.C01.fsa Run date and time: 03/20/2017 - 22:22:03 -> 03/20/2017 - 23:06:41

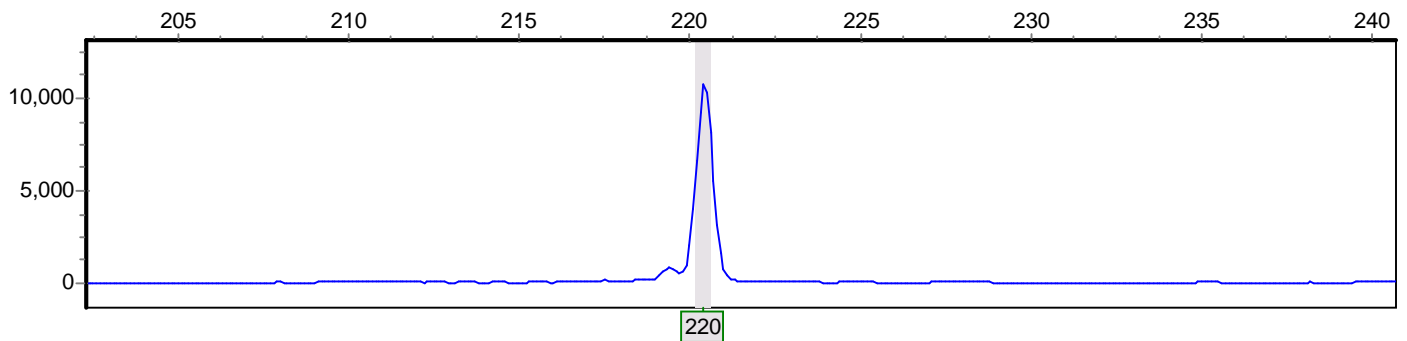

**Sample 4** sorsg1-06.D01.fsa Run date and time: 03/20/2017 - 22:22:03 -> 03/20/2017 - 23:06:41

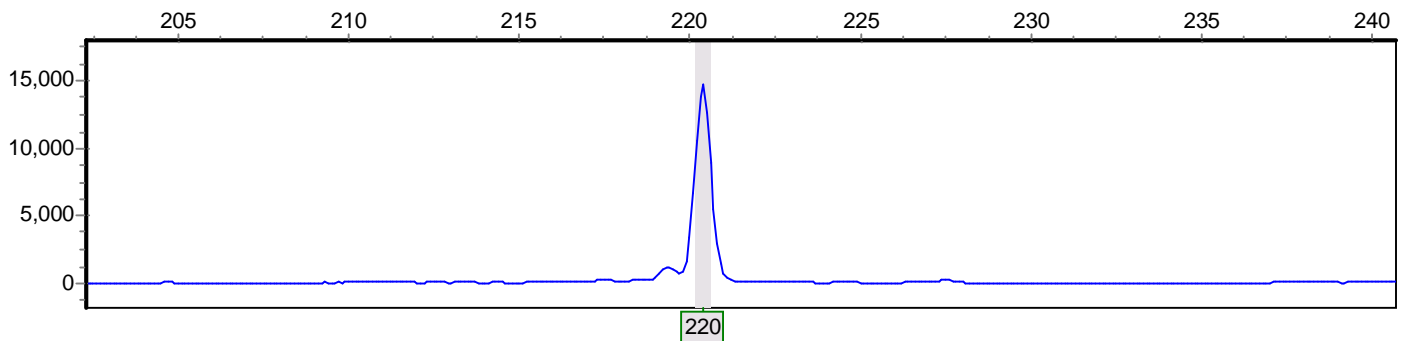

**Sample 5:** sorsg1-07.E04.fsa Run date and time: 03/19/2017 - 18:17:56 -> 03/19/2017 - 19:01:55

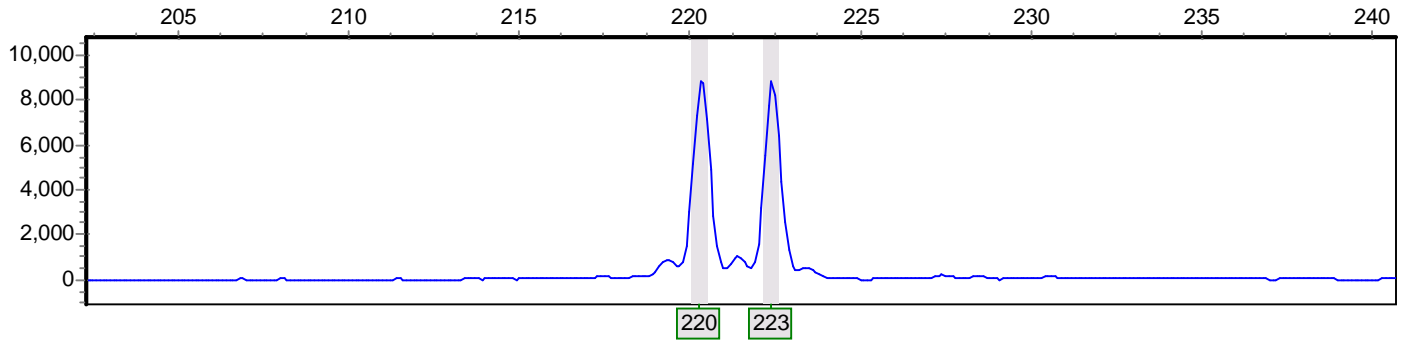

**Sample 6** sorsg1-08-1.E01.fsa Run date and time: 03/20/2017 - 22:22:03 -> 03/20/2017 - 23:06:41

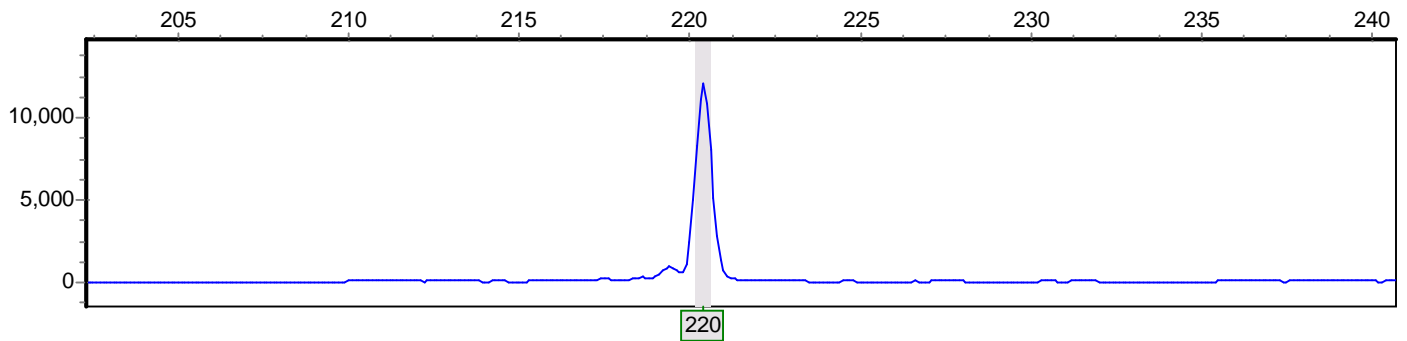

**Sample 7** sorsg1-08.F04.fsa Run date and time: 03/19/2017 - 18:17:56 -> 03/19/2017 - 19:01:55

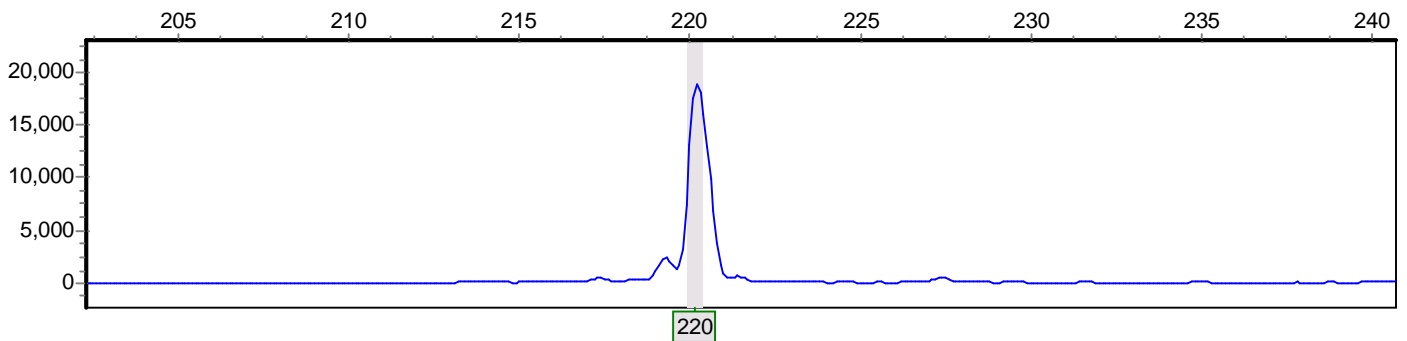

**Sample 8** sorsg1-09.F01.fsa Run date and time: 03/20/2017 - 22:22:03 -> 03/20/2017 - 23:06:41

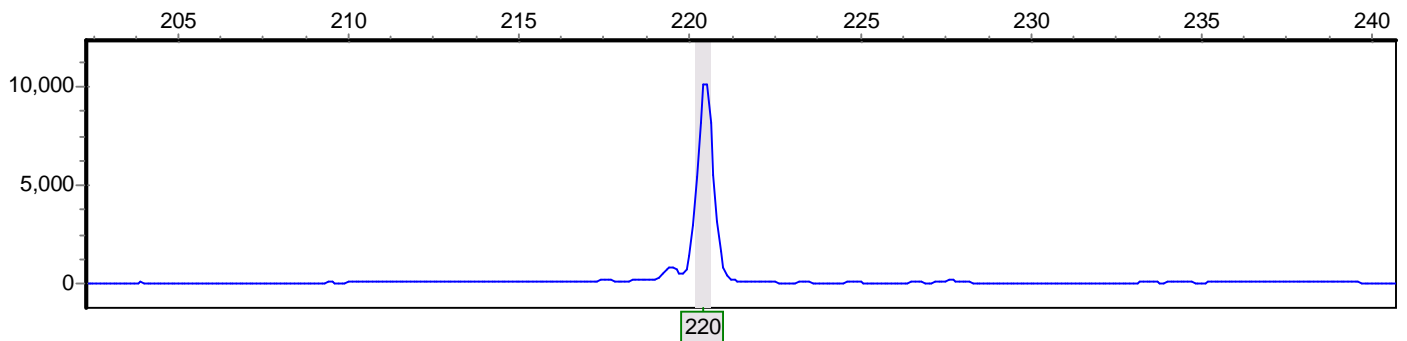

**Sample 1:** sorsg8-01.A11.fsa Run date and time: 03/21/2017 - 13:32:38 -> 03/21/2017 - 14:23:07

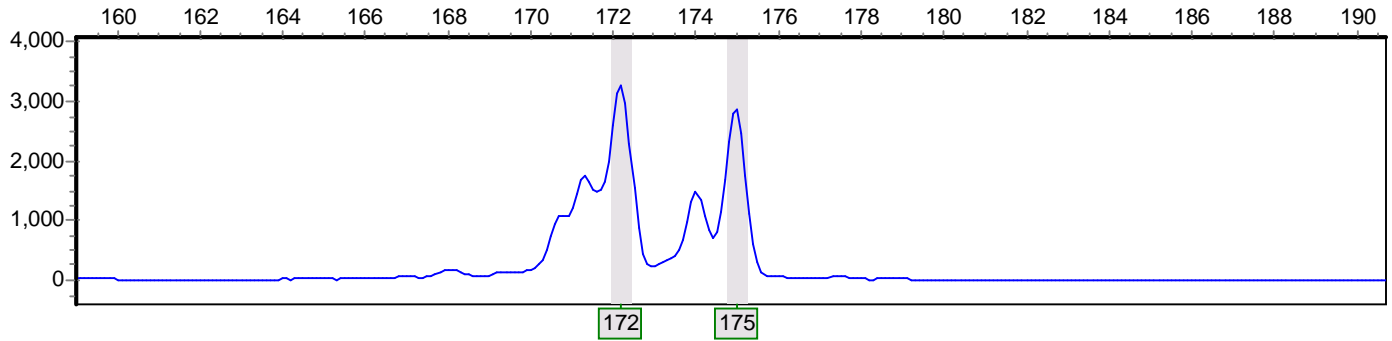

**Sample 2** sorsg8-04.B11.fsa Run date and time: 03/21/2017 - 13:32:38 -> 03/21/2017 - 14:23:07

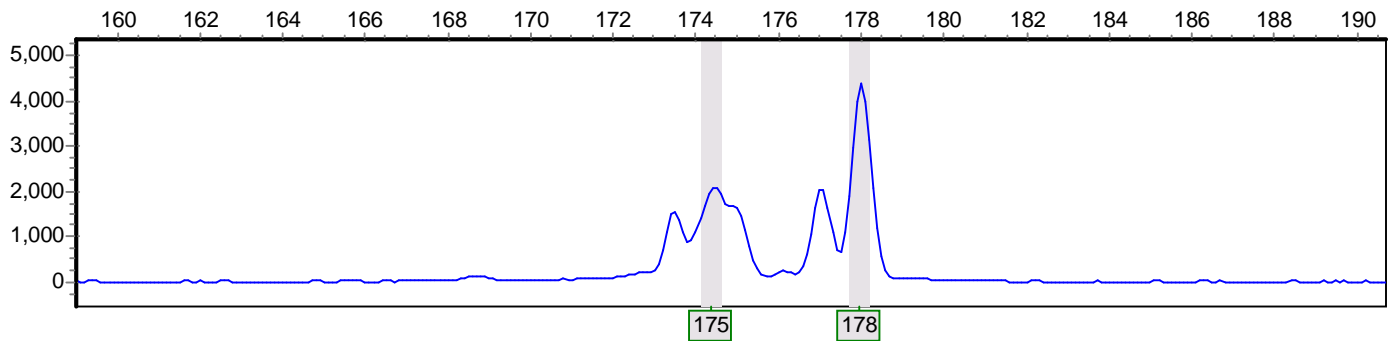

**Sample 3** sorsg8-05.C11.fsa Run date and time: 03/21/2017 - 13:32:38 -> 03/21/2017 - 14:23:07

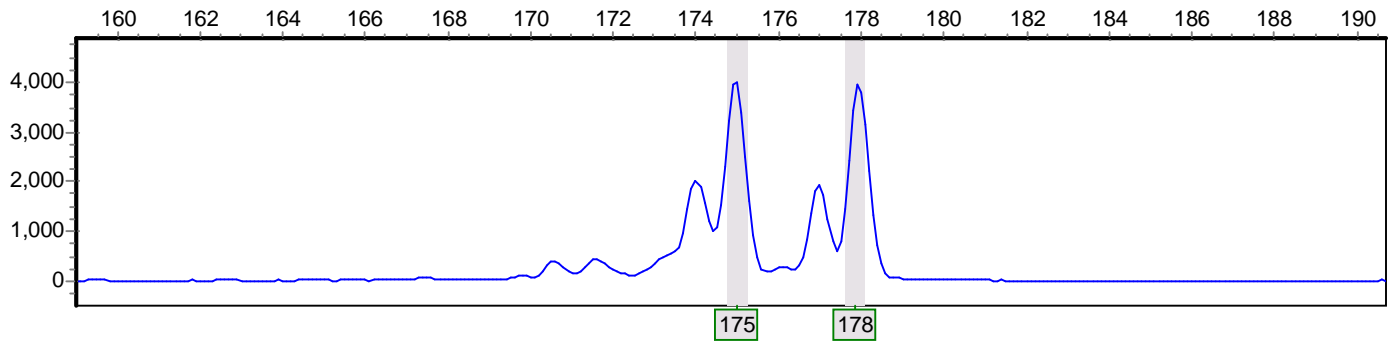

**Sample 4** sorsg8-06.D11.fsa Run date and time: 03/21/2017 - 13:32:38 -> 03/21/2017 - 14:23:07

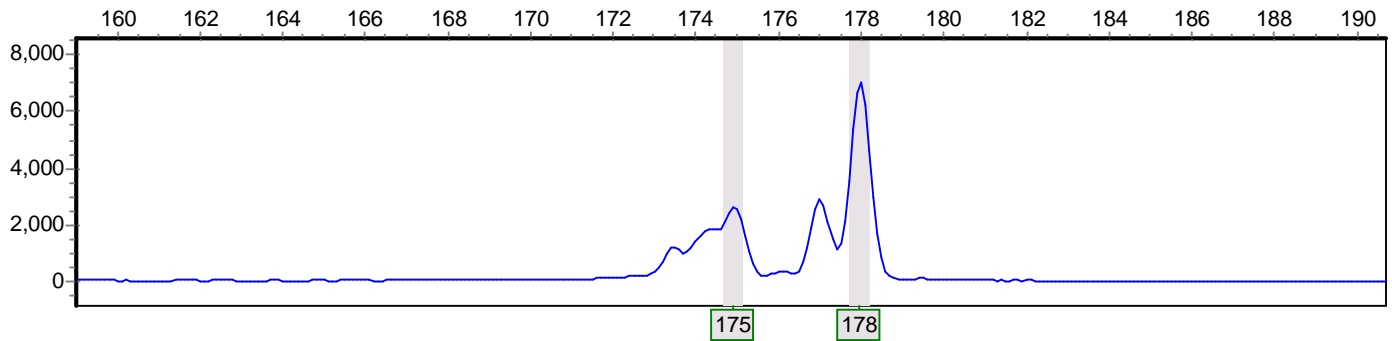

**Sample 5:** sorsg8-07.E11.fsa Run date and time: 03/21/2017 - 13:32:38 -> 03/21/2017 - 14:23:07

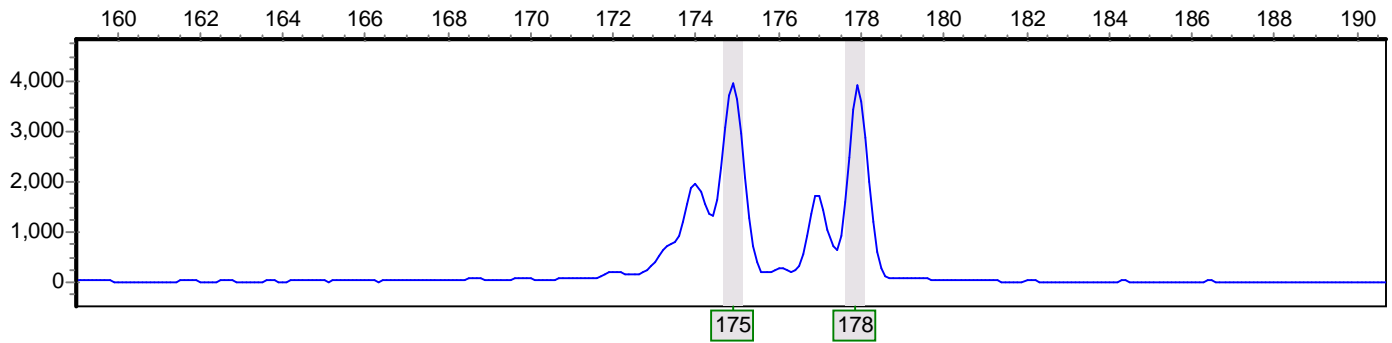

**Sample 6** sorsg8-08-1.G02.fsa Run date and time: 03/19/2017 - 18:17:56 -> 03/19/2017 - 19:01:55

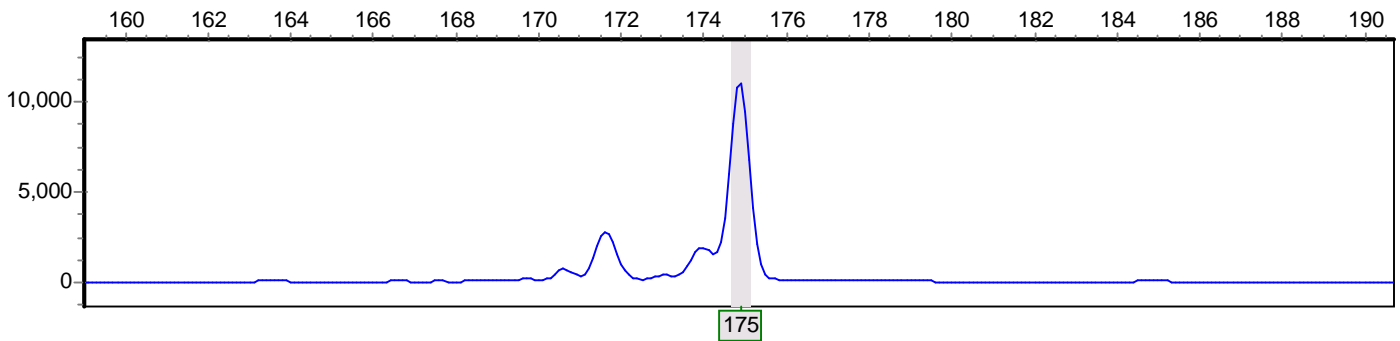

**Sample 7** sorsg8-08.F11.fsa Run date and time: 03/21/2017 - 13:32:38 -> 03/21/2017 - 14:23:07

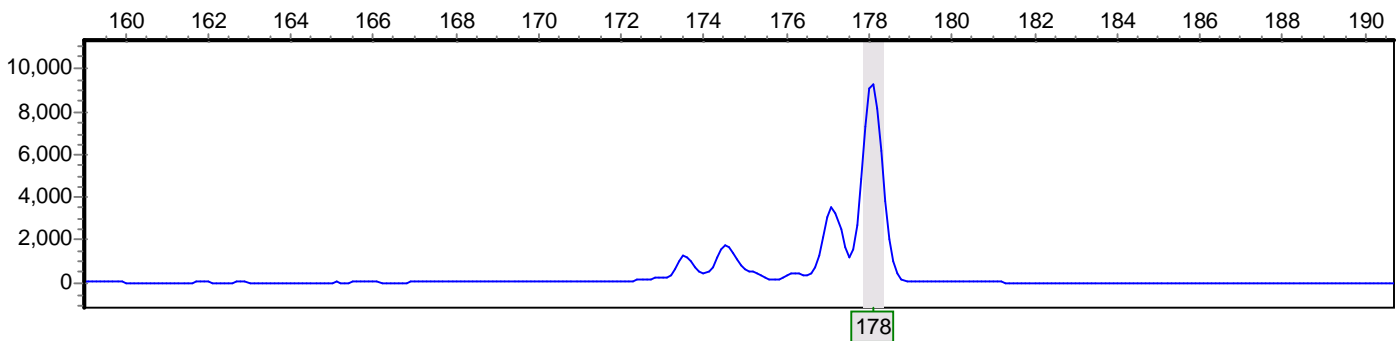

**Sample 8** sorsg8-09.H02.fsa Run date and time: 03/19/2017 - 18:17:56 -> 03/19/2017 - 19:01:55

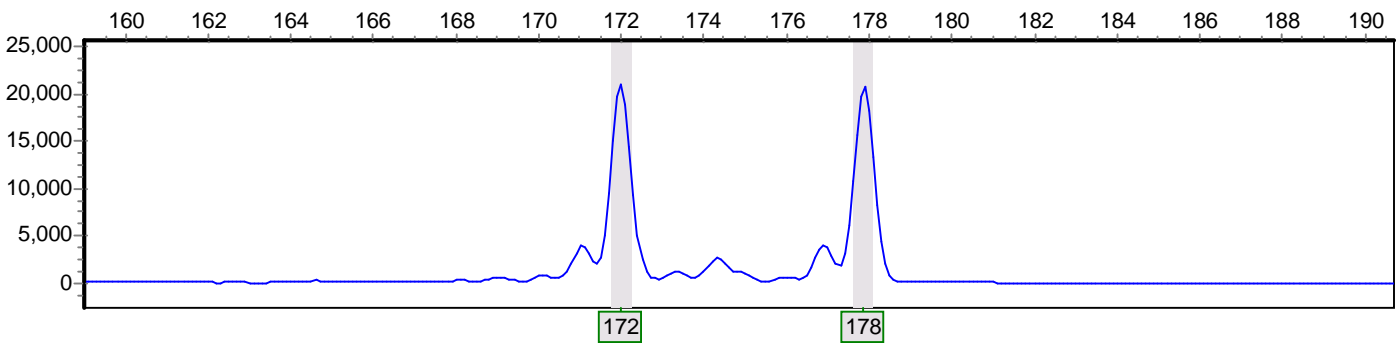

**Sample 1:** sorsh13-01.A05.fsa Run date and time: 03/21/2017 - 13:32:38 -> 03/21/2017 - 14:23:07

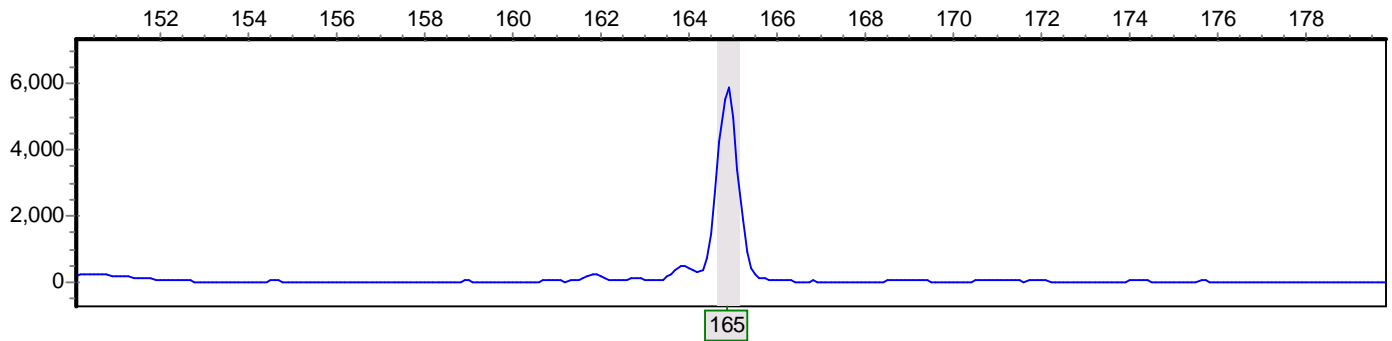

**Sample 2** sorsh13-04.B05.fsa Run date and time: 03/20/2017 - 22:22:03 -> 03/20/2017 - 23:06:41

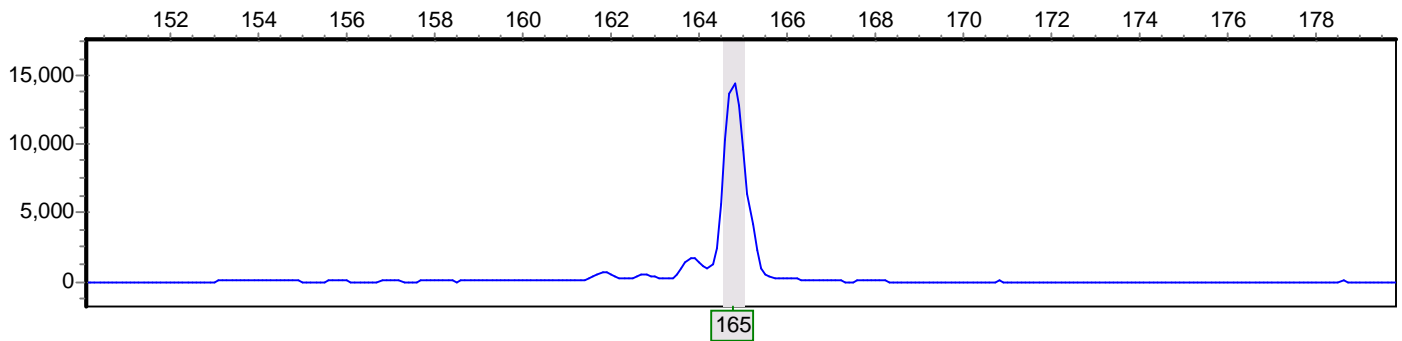

**Sample 3** sorsh13-05.C05.fsa Run date and time: 03/20/2017 - 22:22:03 -> 03/20/2017 - 23:06:41

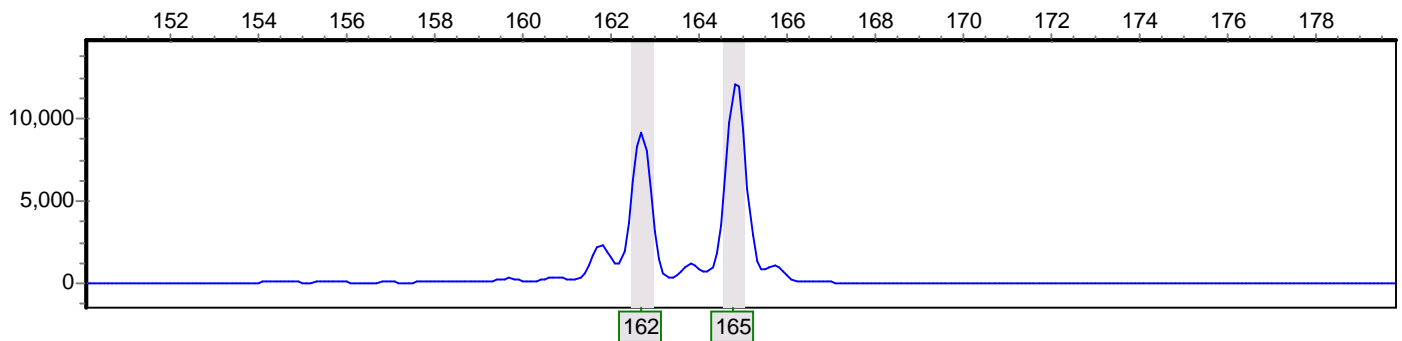

**Sample 4** sorsh13-06.D05.fsa Run date and time: 03/20/2017 - 22:22:03 -> 03/20/2017 - 23:06:41

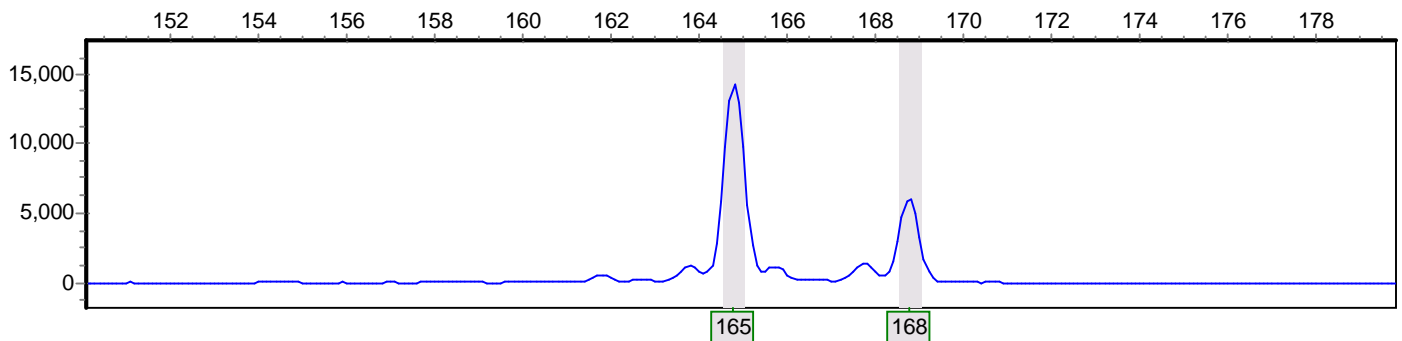

**Sample 5:** sorsh13-07.E05.fsa Run date and time: 03/20/2017 - 22:22:03 -> 03/20/2017 - 23:06:41

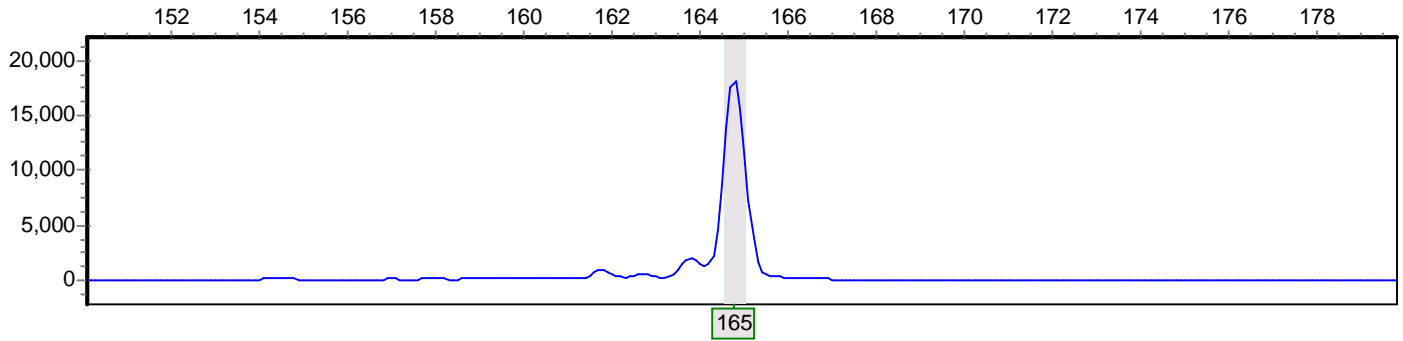

**Sample 6** sorsh13-08-1.C05.fsa Run date and time: 03/19/2017 - 18:17:56 -> 03/19/2017 - 19:01:55

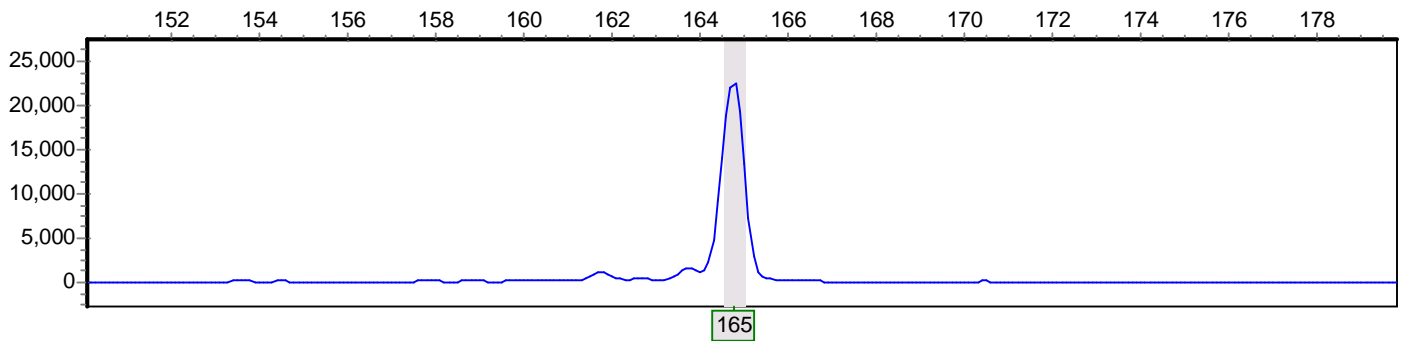

**Sample 7** sorsh13-08.F05.fsa Run date and time: 03/21/2017 - 13:32:38 -> 03/21/2017 - 14:23:07

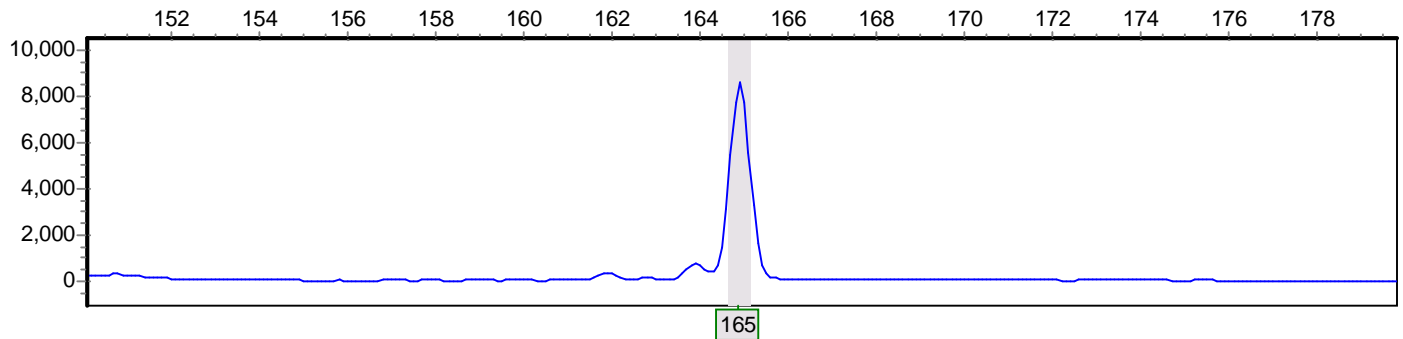

**Sample 8** sorsh13-09.D05.fsa Run date and time: 03/19/2017 - 18:17:56 -> 03/19/2017 - 19:01:55

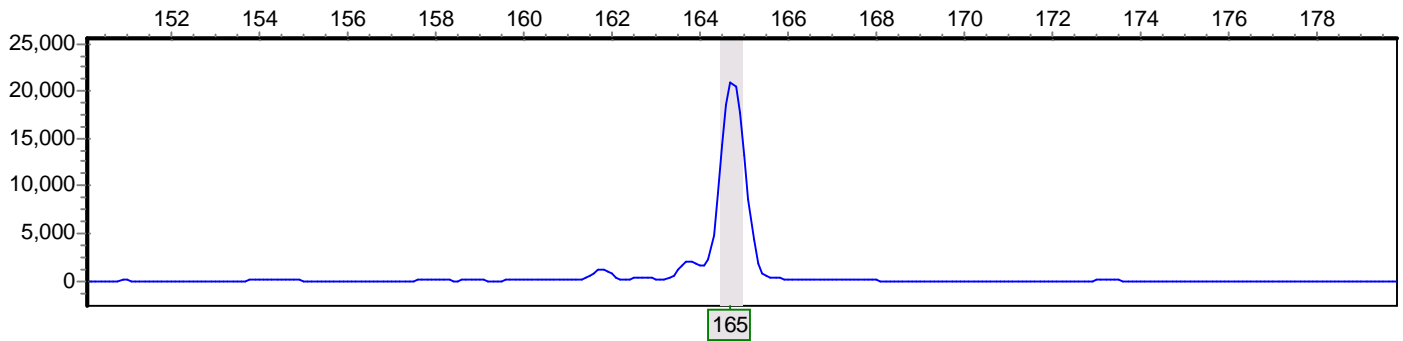



Sample 1: sorsj14-01.A07.fsa Run date and time: 03/20/2017 - 22:22:03 -> 03/20/2017 - 23:06:41

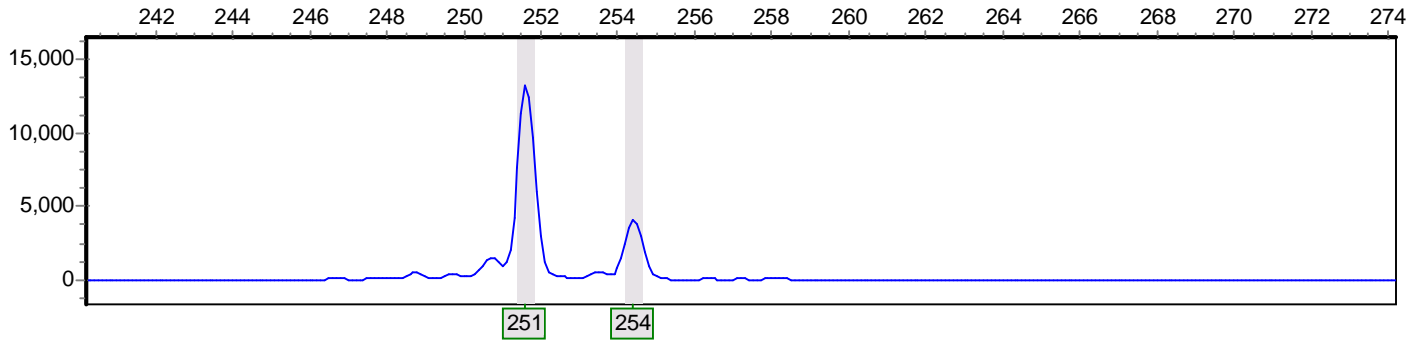

Sample 2 sorsj14-04.B07.fsa Run date and time: 03/20/2017 - 22:22:03 -> 03/20/2017 - 23:06:41

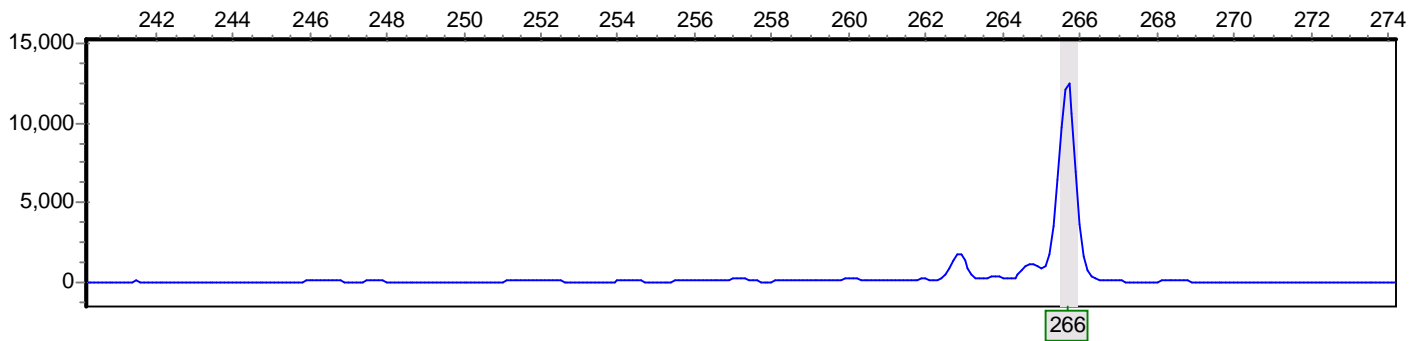

Sample 3 sorsj14-05.C07.fsa Run date and time: 03/20/2017 - 22:22:03 -> 03/20/2017 - 23:06:41

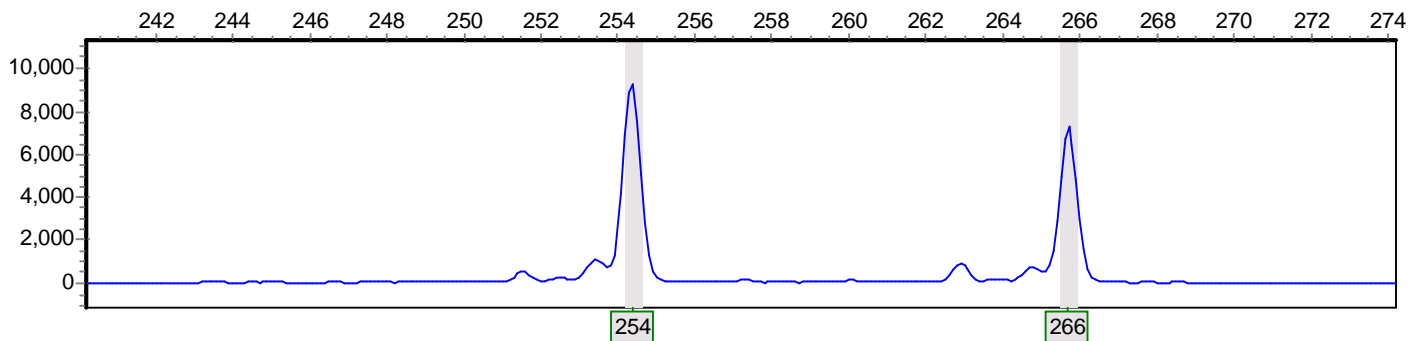

Sample 4 sorsj14-06.D07.fsa Run date and time: 03/20/2017 - 22:22:03 -> 03/20/2017 - 23:06:41

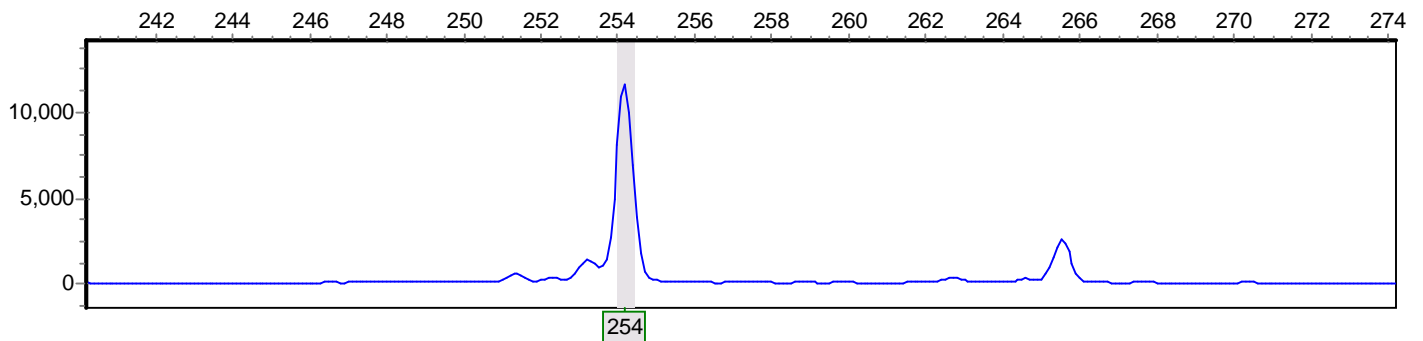

Sample 5: sorsj14-07.E07.fsa Run date and time: 03/20/2017 - 22:22:03 -> 03/20/2017 - 23:06:41

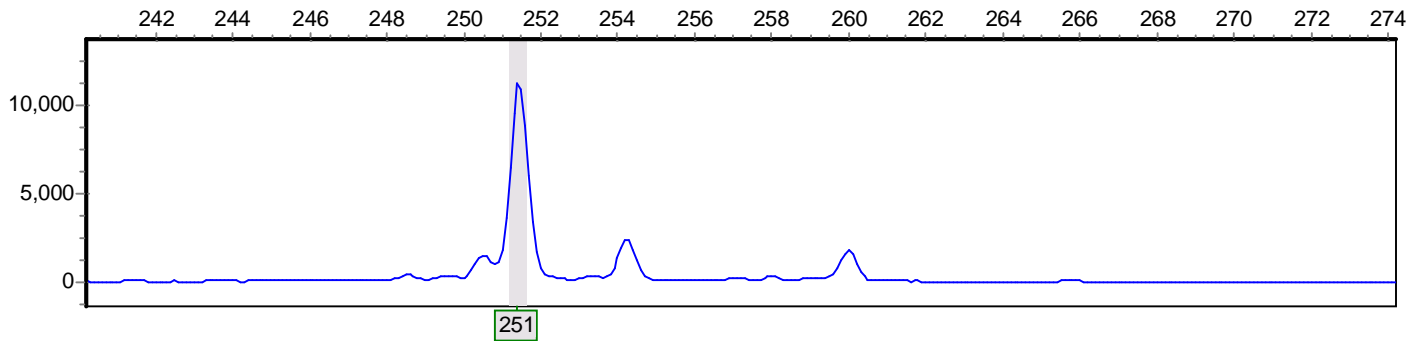

Sample 6 sorsj14-08-1.G05.fsa Run date and time: 03/19/2017 - 18:17:56 -> 03/19/2017 - 19:01:55

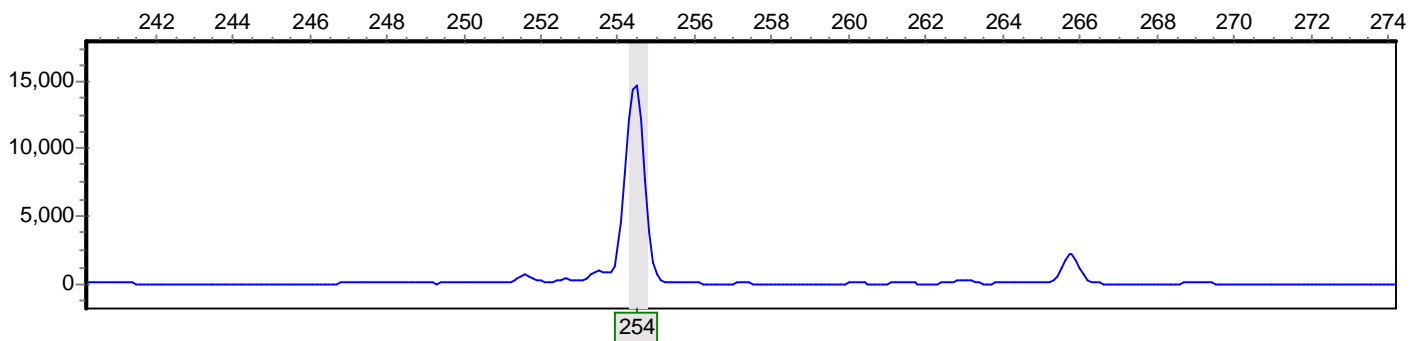

Sample 7 sorsj14-08.F07.fsa Run date and time: 03/20/2017 - 22:22:03 -> 03/20/2017 - 23:06:41

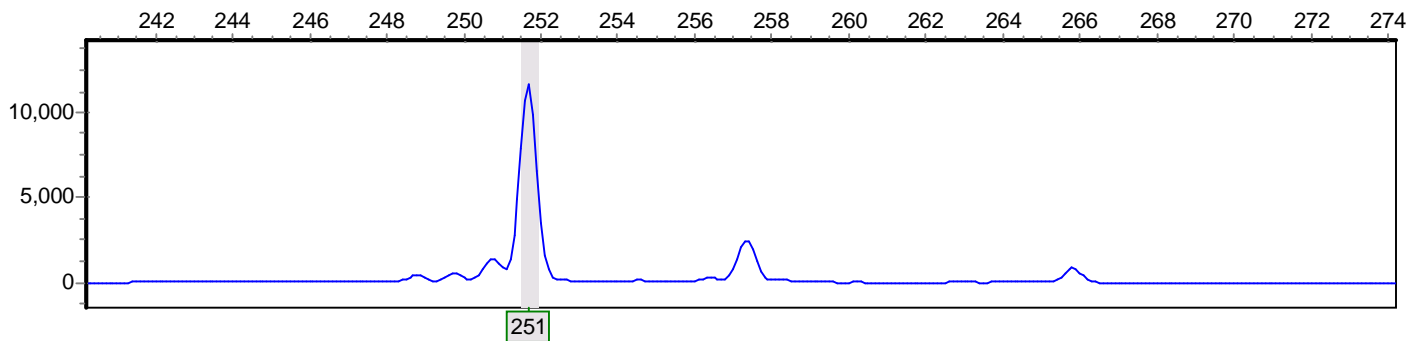

Sample 8 sorsj14-09.H05.fsa Run date and time: 03/19/2017 - 18:17:56 -> 03/19/2017 - 19:01:55

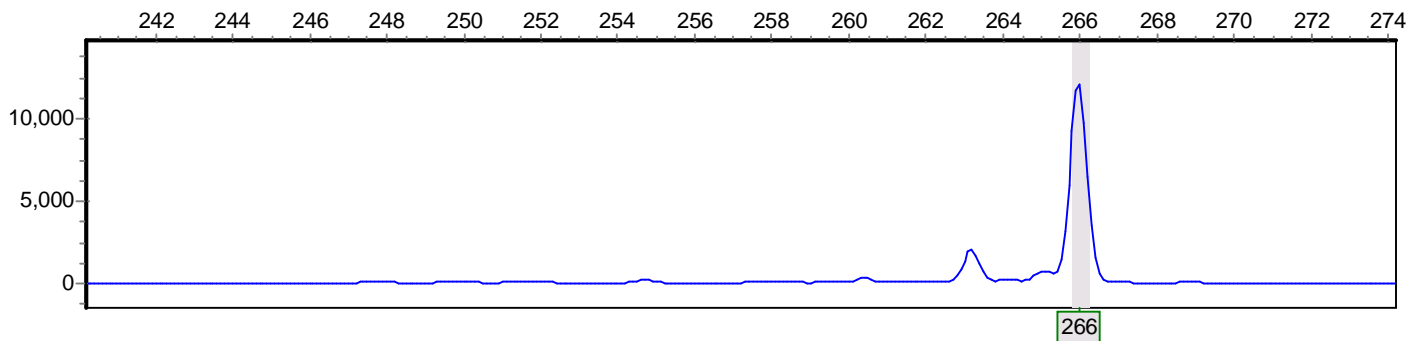

**Sample 1:** sorsj16-01.A08.fsa Run date and time: 03/20/2017 - 22:22:03 -> 03/20/2017 - 23:06:41

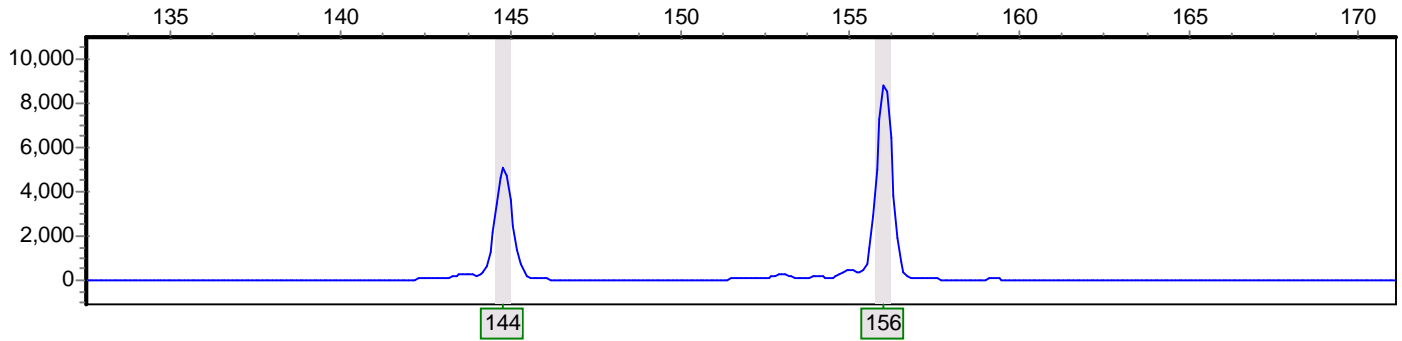

**Sample 2** sorsj16-04.B08.fsa Run date and time: 03/20/2017 - 22:22:03 -> 03/20/2017 - 23:06:41

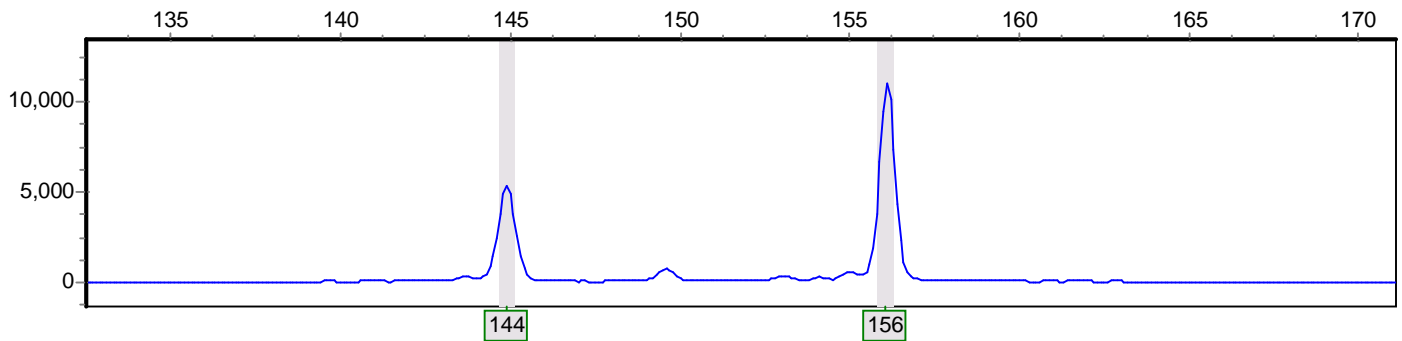

**Sample 3** sorsj16-05.C08.fsa Run date and time: 03/20/2017 - 22:22:03 -> 03/20/2017 - 23:06:41

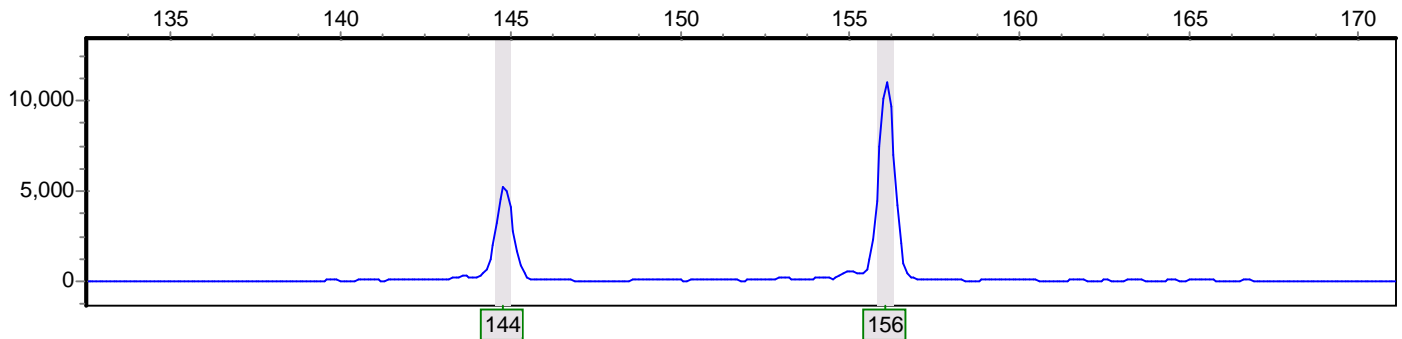

**Sample 4** sorsj16-06.D08.fsa Run date and time: 03/20/2017 - 22:22:03 -> 03/20/2017 - 23:06:41

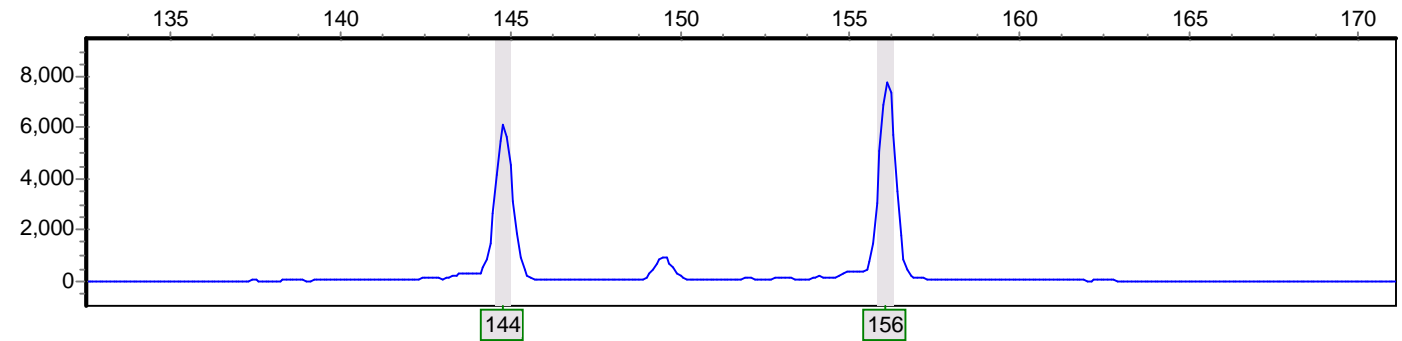

**Sample 5:** sorsj16-07.E08.fsa Run date and time: 03/20/2017 - 22:22:03 -> 03/20/2017 - 23:06:41

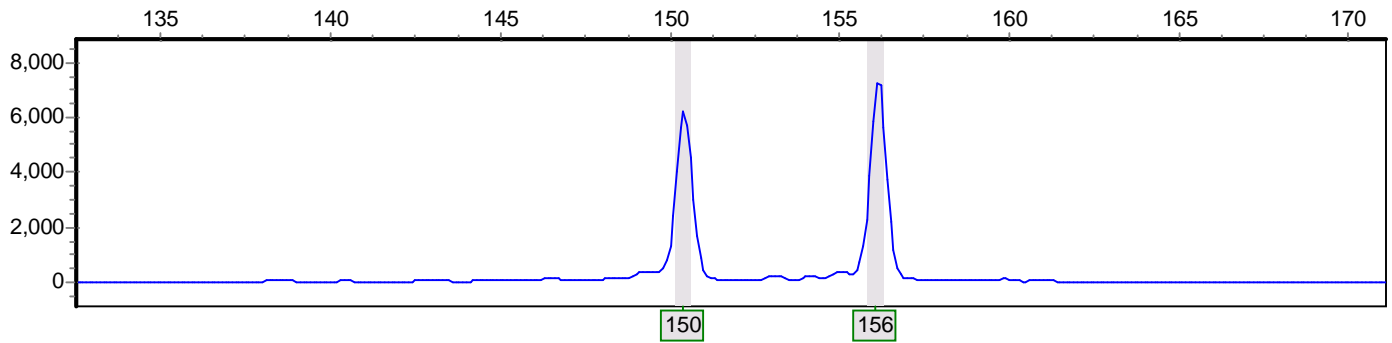

**Sample 6** sorsj16-08-1.A06.fsa Run date and time: 03/19/2017 - 18:17:56 -> 03/19/2017 - 19:01:55

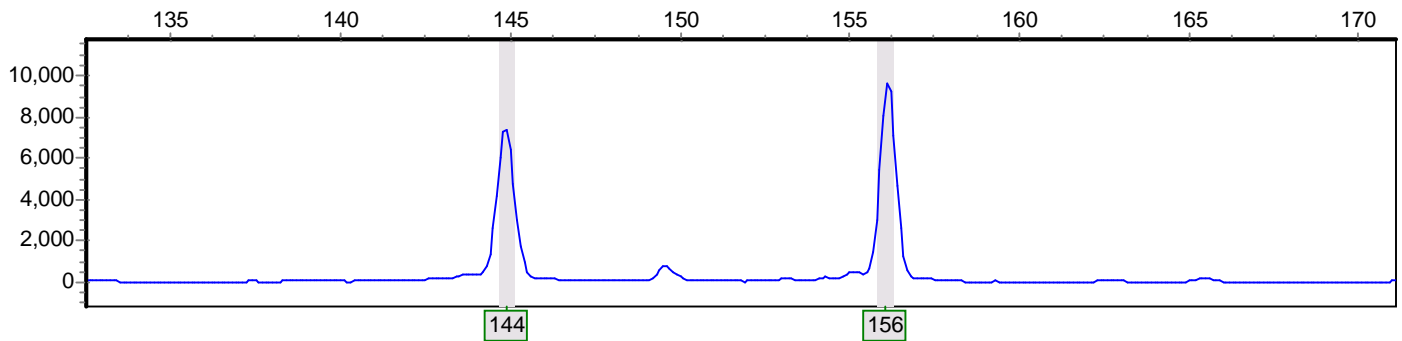

**Sample 7** sorsj16-08.F08.fsa Run date and time: 03/20/2017 - 22:22:03 -> 03/20/2017 - 23:06:41

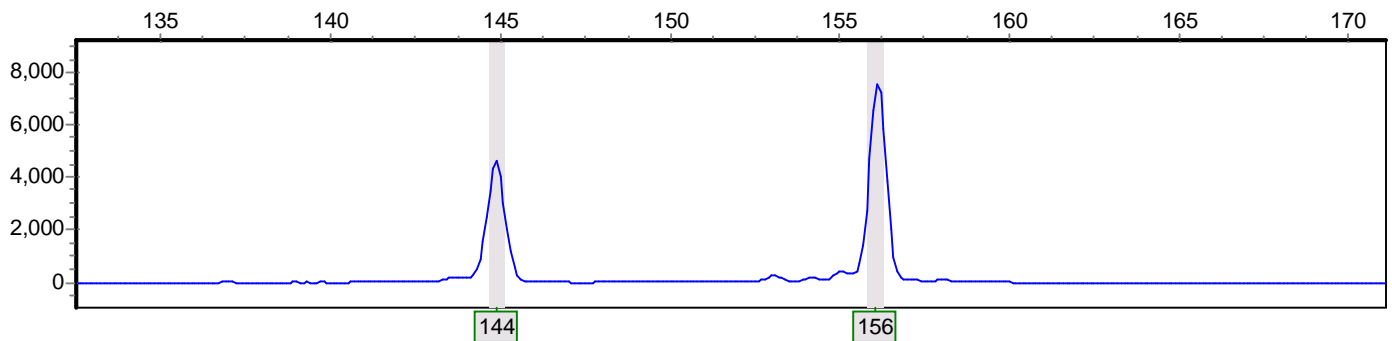

**Sample 8** sorsj16-09.B06.fsa Run date and time: 03/19/2017 - 18:17:56 -> 03/19/2017 - 19:01:55

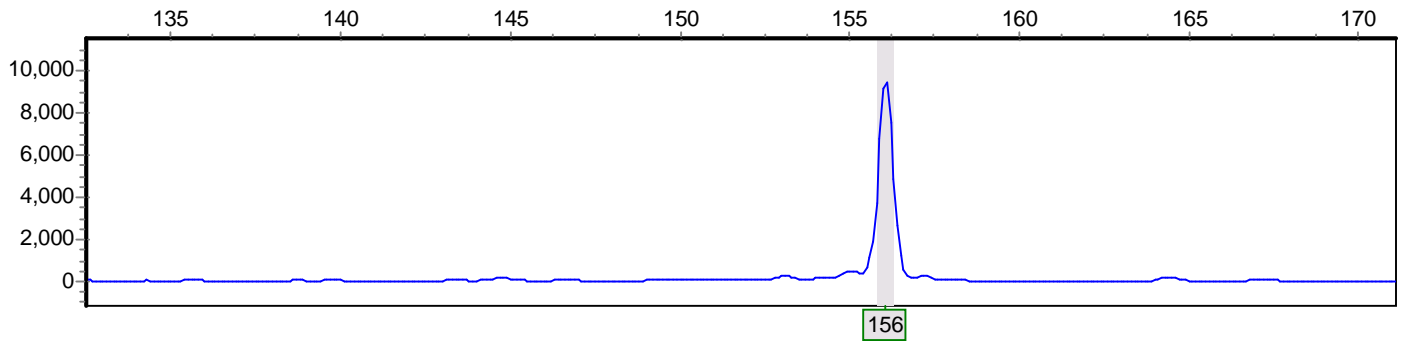

**Sample 1:** sorsk10-01.A09.fsa Run date and time: 03/20/2017 - 22:22:03 -> 03/20/2017 - 23:06:41

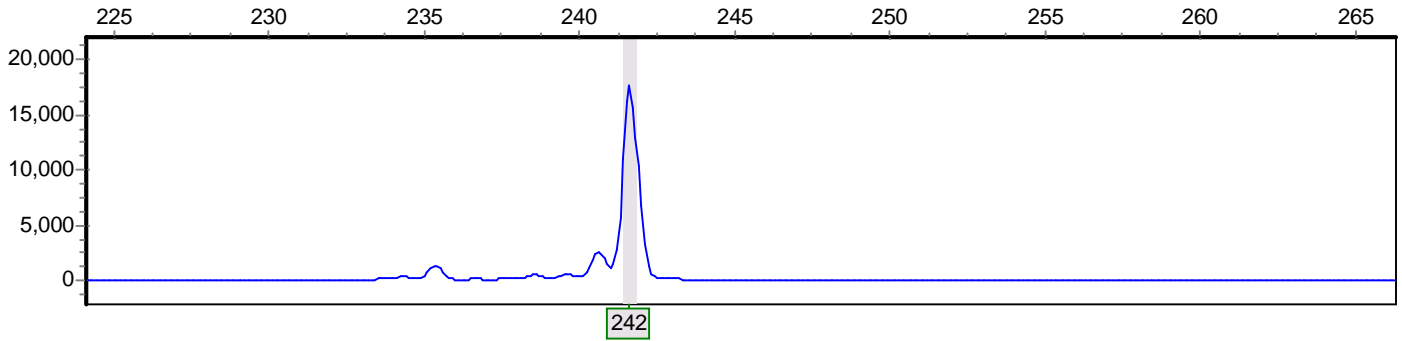

**Sample 2** sorsk10-04.B09.fsa Run date and time: 03/20/2017 - 22:22:03 -> 03/20/2017 - 23:06:41

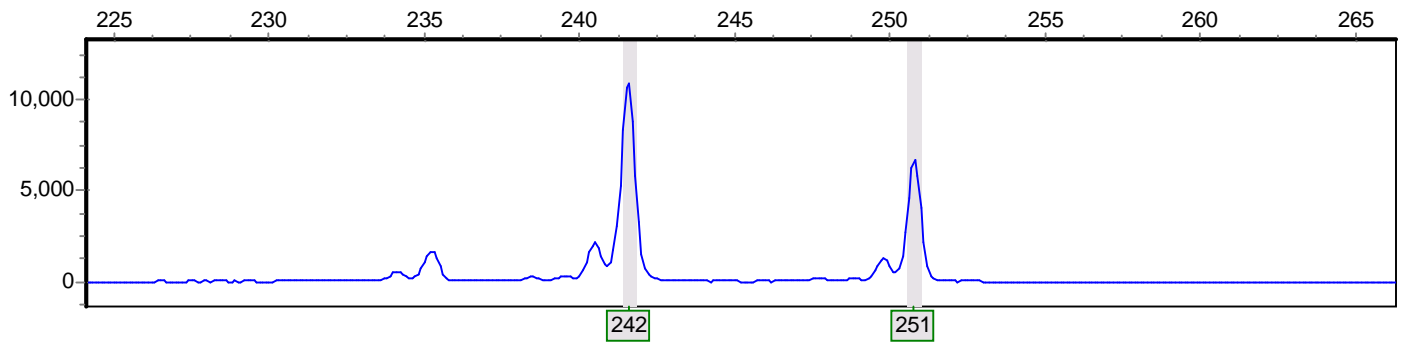

**Sample 3** sorsk10-05.C09.fsa Run date and time: 03/20/2017 - 22:22:03 -> 03/20/2017 - 23:06:41

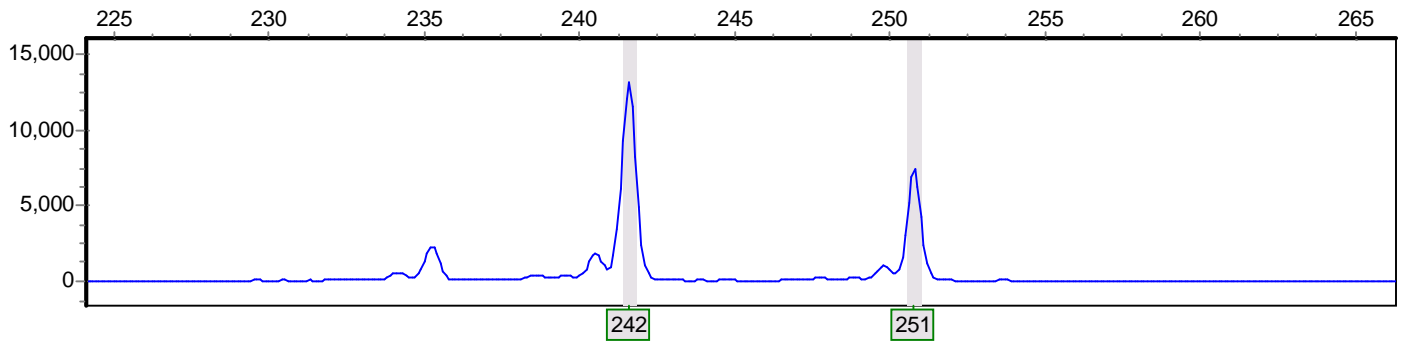

**Sample 4** sorsk10-06.D09.fsa Run date and time: 03/20/2017 - 22:22:03 -> 03/20/2017 - 23:06:41

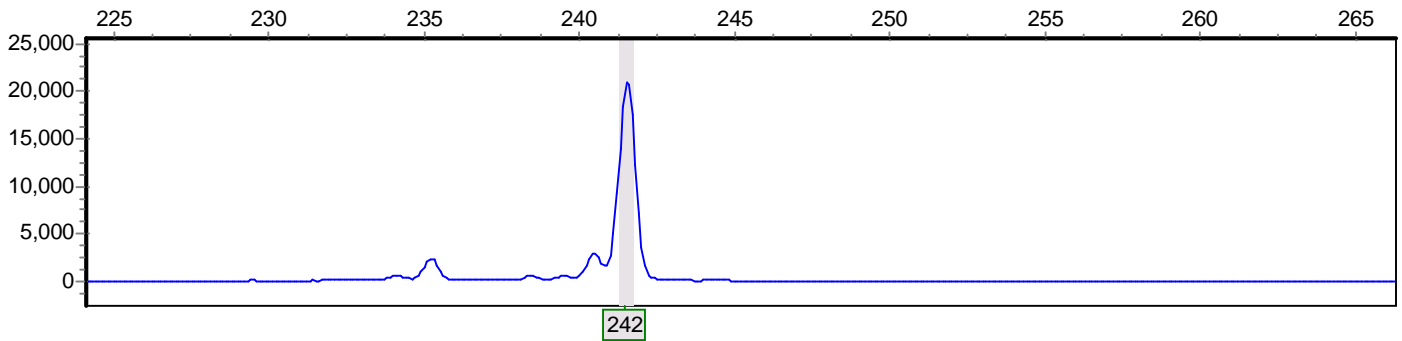

**Sample 5:** sorsk10-07.E09.fsa Run date and time: 03/20/2017 - 22:22:03 -> 03/20/2017 - 23:06:41

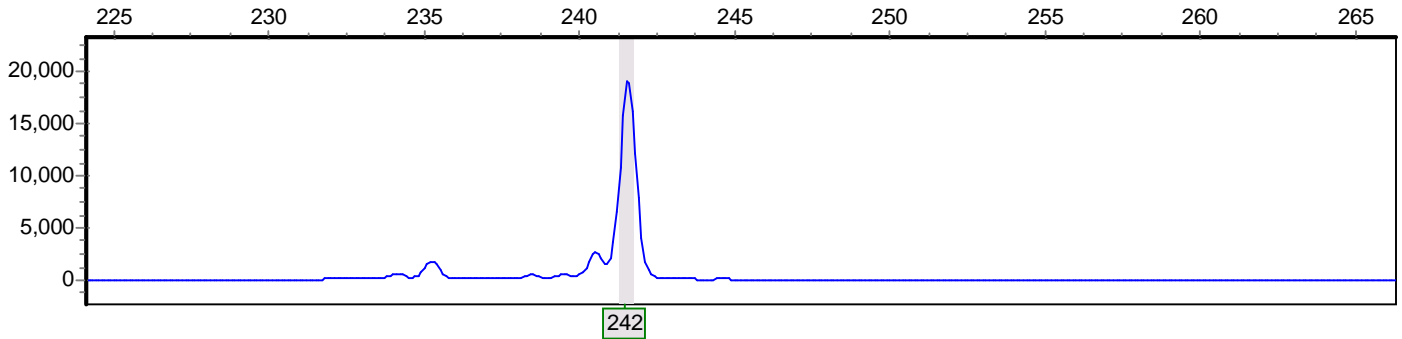

**Sample 6** sorsk10-08-1.C06.fsa Run date and time: 03/19/2017 - 18:17:56 -> 03/19/2017 - 19:01:55

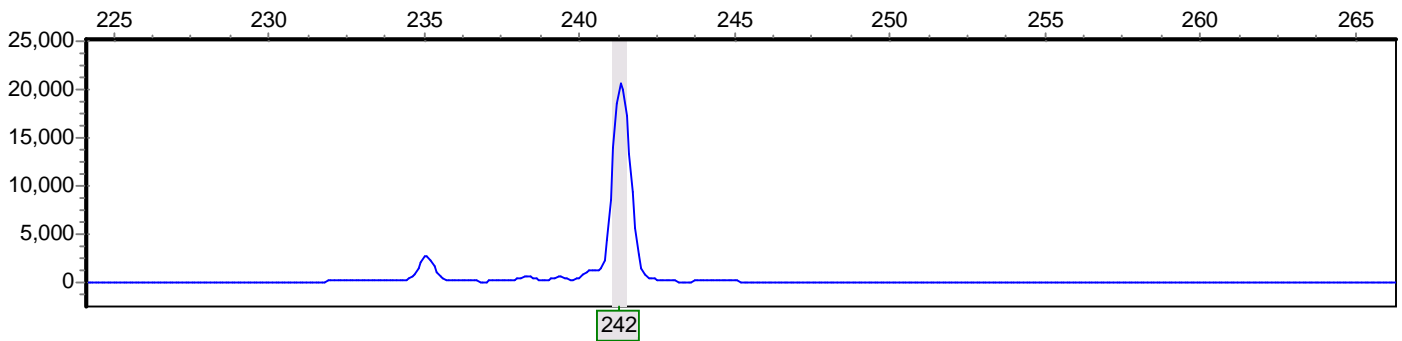

**Sample 7** sorsk10-08.F09.fsa Run date and time: 03/20/2017 - 22:22:03 -> 03/20/2017 - 23:06:41

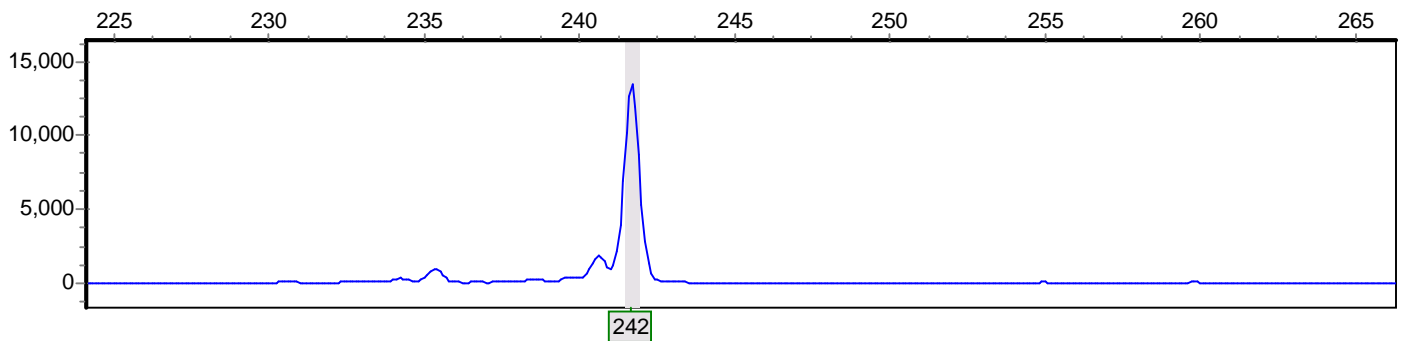

**Sample 8** sorsk10-09.D06.fsa Run date and time: 03/19/2017 - 18:17:56 -> 03/19/2017 - 19:01:55

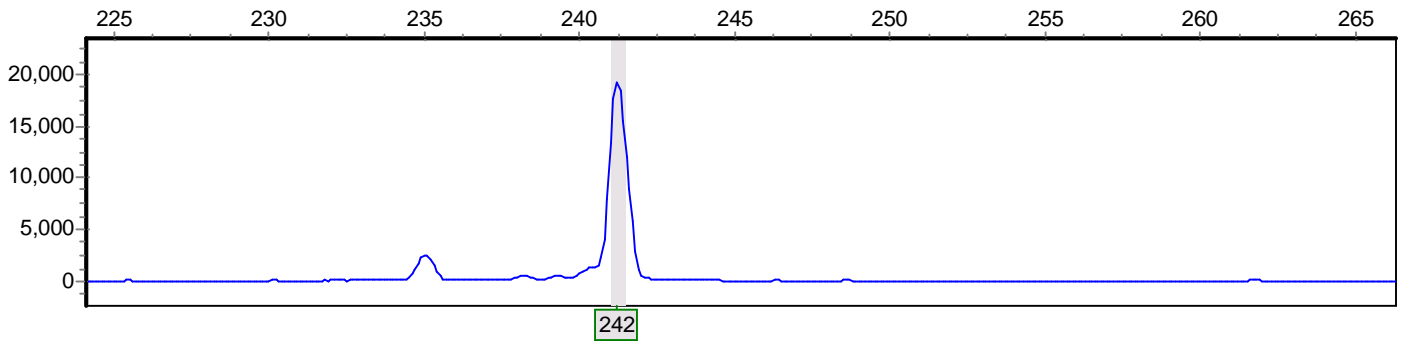

Supplement: pone.0179219.s009.pdf [file pone.0179219.s009.pdf]
